# Supplementary material
Source: PubMed Central journal article supplement (PMC3509716)

## Supporting Information

**Figure 1.**  $^1\text{H}$  NMR spectrum (600 MHz, methanol- $d_4$ ) of 24-O-acetylhydroshengmanol 3-O- $\beta$ -D-xylopyranoside- $\Delta^{16,17}$ -enol ether (**1**).

**Figure 2.** dqfCOSY spectrum (600 MHz, methanol- $d_4$ ) of 24-O-acetylhydroshengmanol 3-O- $\beta$ -D-xylopyranoside- $\Delta^{16,17}$ -enol ether (**1**).

**Figure 3.** HMQC spectrum (600 MHz, methanol- $d_4$ ) of 24-O-acetylhydroshengmanol 3-O- $\beta$ -D-xylopyranoside- $\Delta^{16,17}$ -enol ether (**1**).

**Figure 4.** HMBC spectrum (600 MHz, methanol- $d_4$ ) of 24-O-acetylhydroshengmanol 3-O- $\beta$ -D-xylopyranoside- $\Delta^{16,17}$ -enol ether (**1**).

**Figure 5.** NOESY spectrum (600 MHz, methanol- $d_4$ ) of 24-O-acetylhydroshengmanol 3-O- $\beta$ -D-xylopyranoside- $\Delta^{16,17}$ -enol ether (**1**).

**Table 1.** List of compounds with alternate naming and Chemical Abstracts Service Registry Number.

**Chemistry:** Syntheses of compounds **10**, **11**, and **12**.

**Scheme:** Fractionation of *Actaea racemosa* extract.

**Pharmacological selectivity screening panel assays.**

**Analytical Method for PK analyses.**

**Three-step procedure for the isolation of compounds 1, 5, 6, 7, 8, 9.**

**IP-MS analysis of A $\beta$ (1-X) of cell-conditioned medium.**

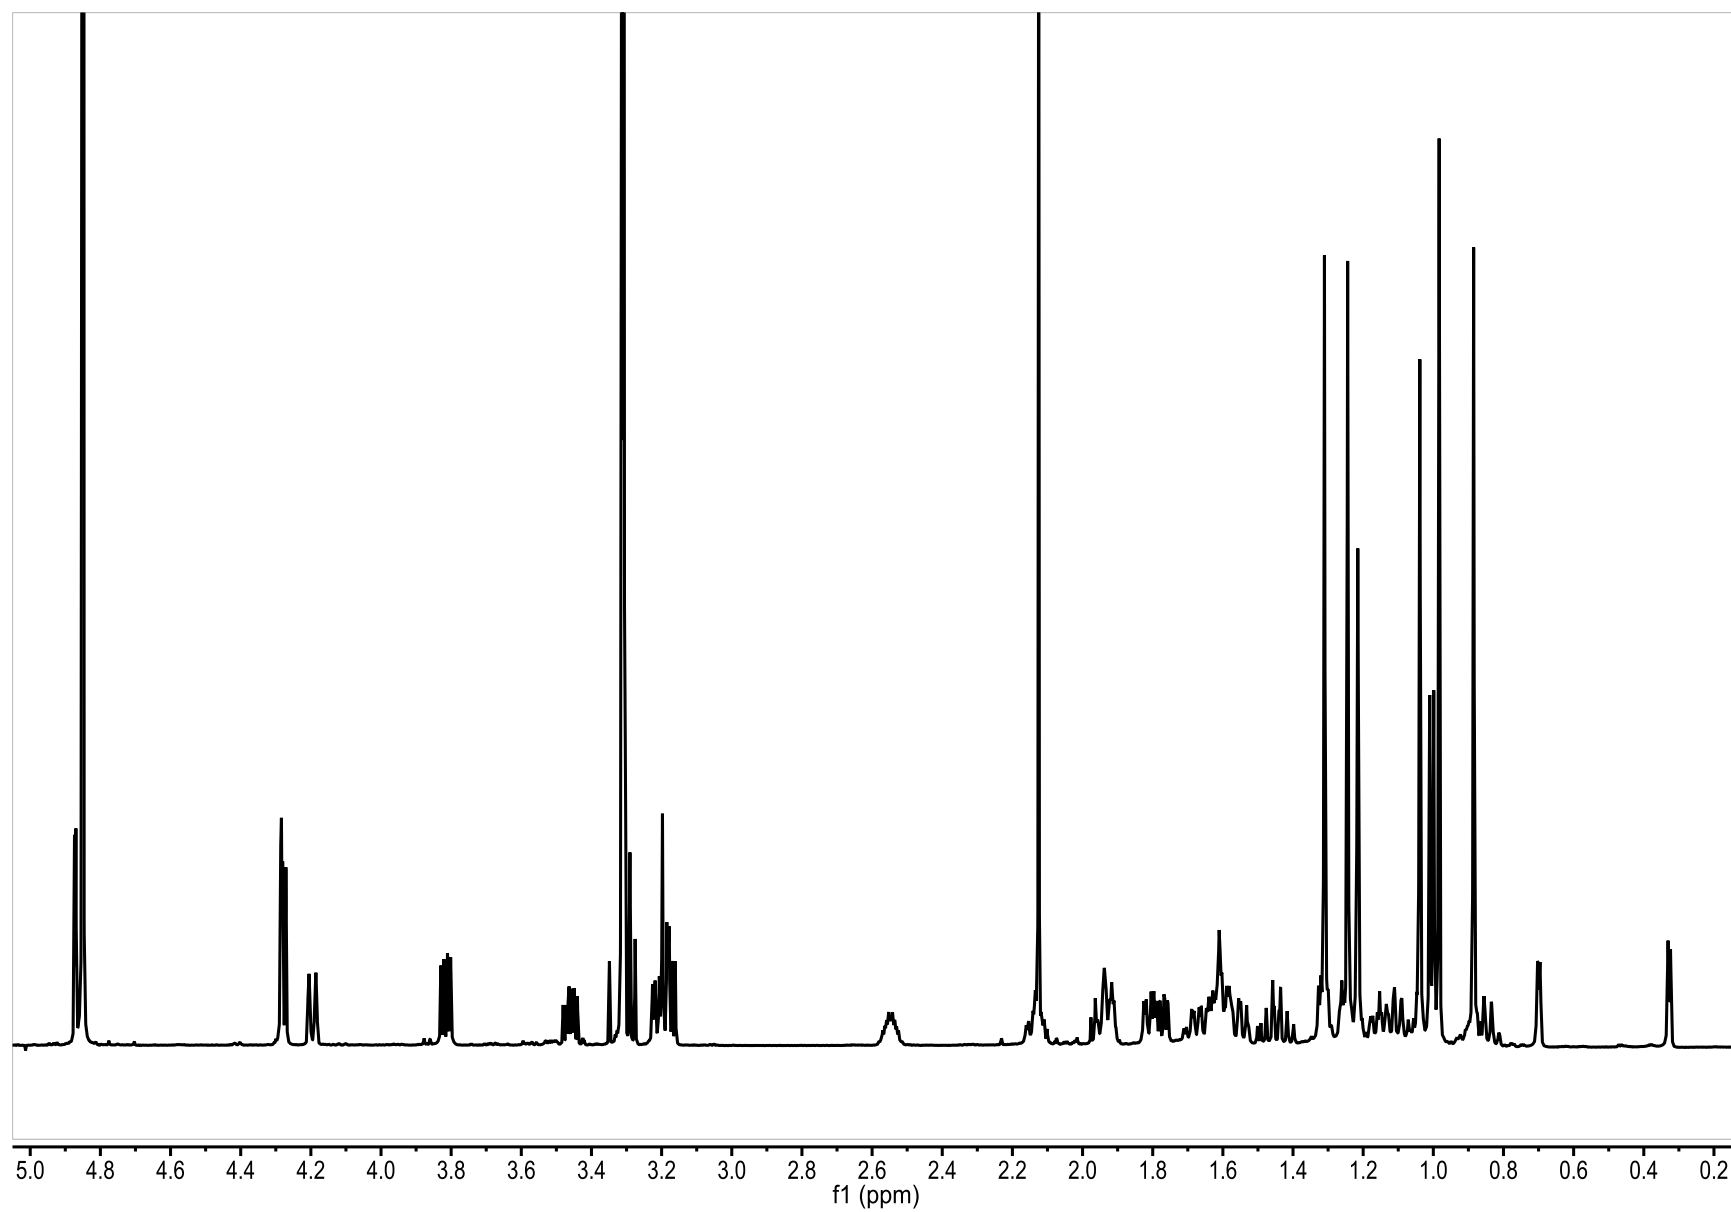

**Figure 1.** <sup>1</sup>H NMR spectrum (600 MHz, methanol-*d*<sub>4</sub>) of 24-O-acetylhydroshengmanol 3-O-β-D-xylopyranoside-Δ<sup>16,17</sup>-enol ether (**1**).

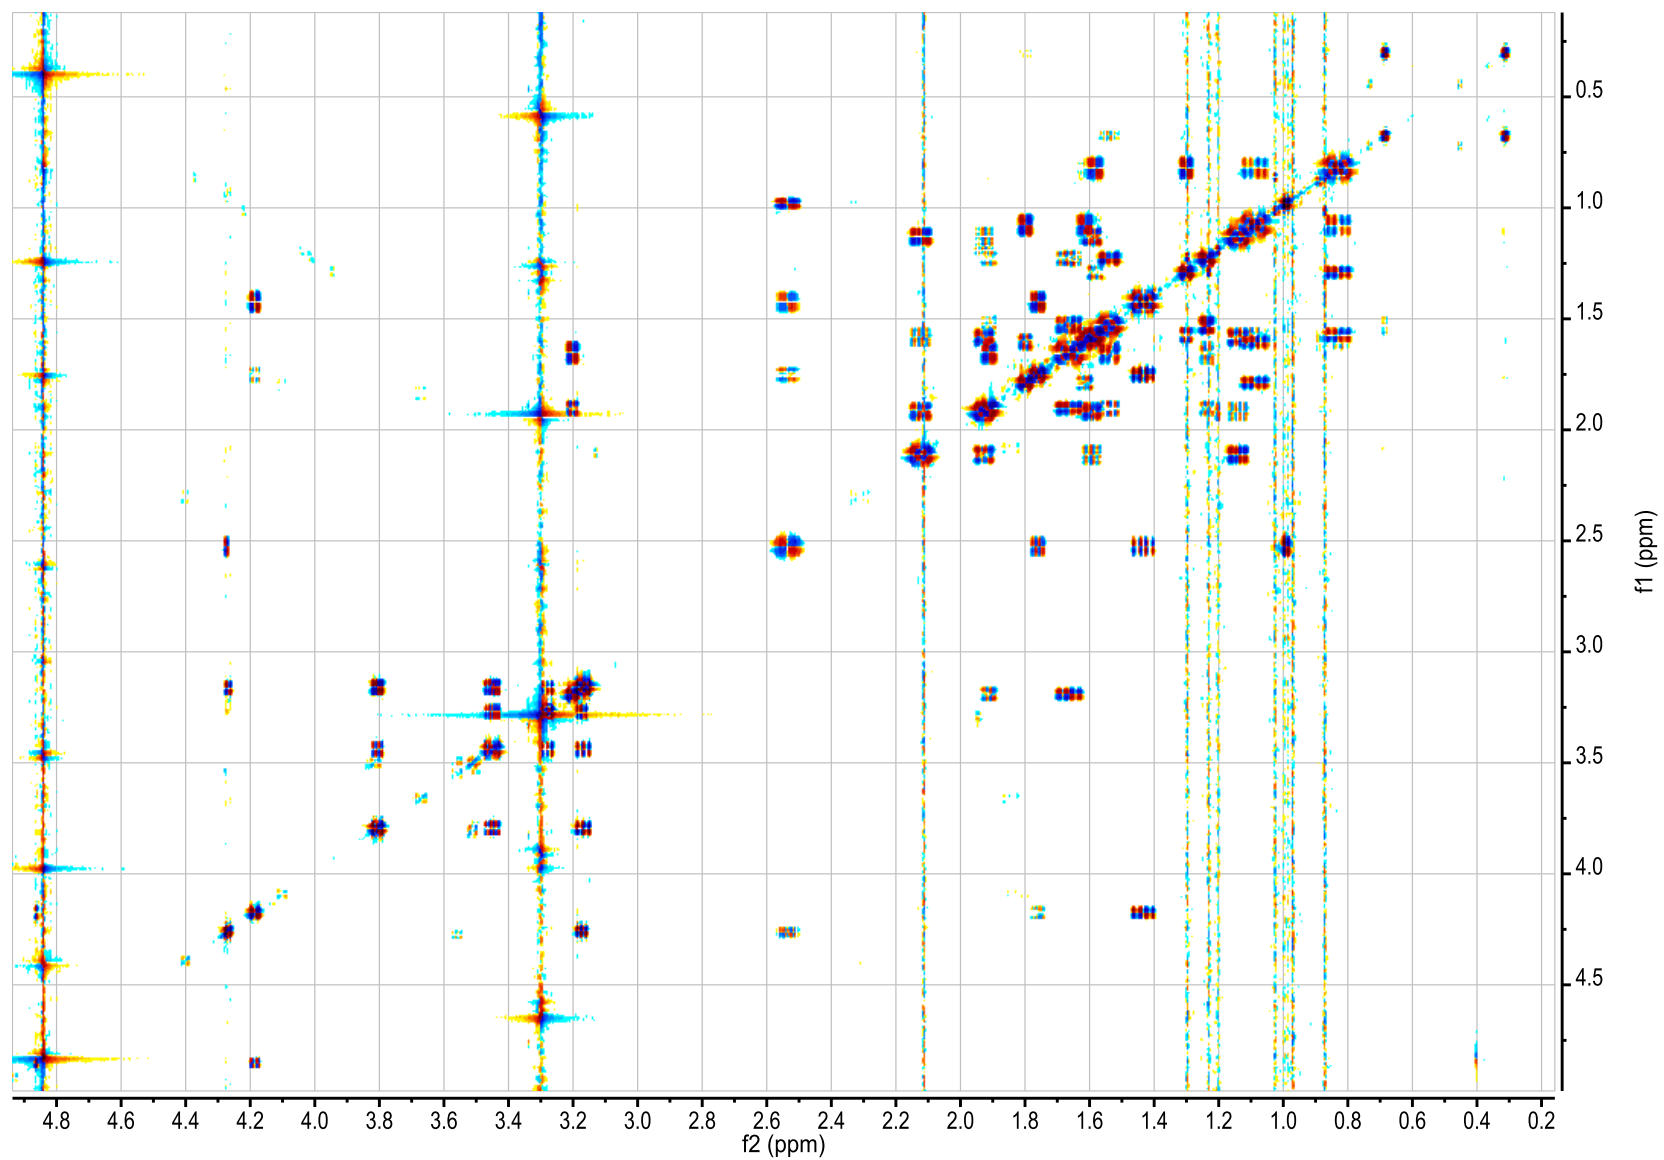

**Figure 2.** dqfCOSY spectrum (600 MHz, methanol- $d_4$ ) of 24-O-acetylhydroshengmanol 3-O- $\beta$ -D-xylopyranoside- $\Delta^{16,17}$ -enol ether (**1**).

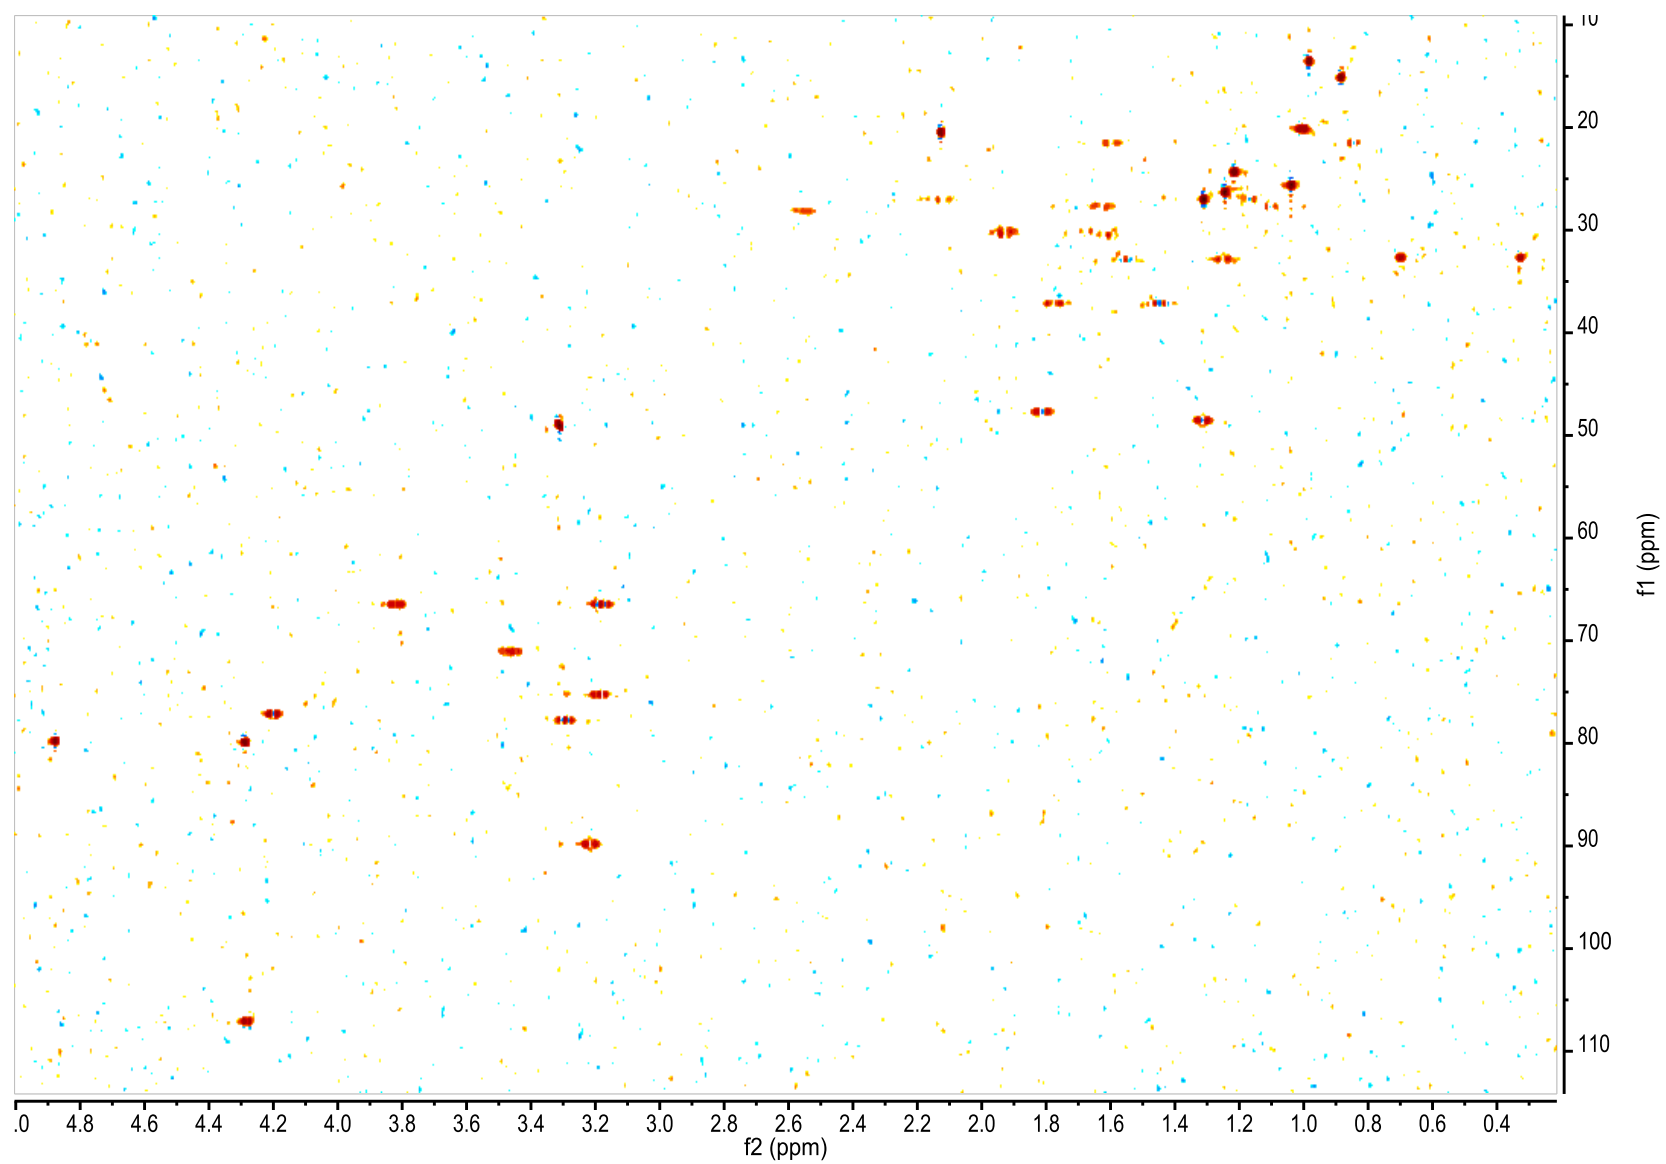

**Figure 3.** HMQC spectrum (600 MHz, methanol-*d*<sub>4</sub>) of 24-O-acetylhydroshengmanol 3-O-β-D-xylopyranoside-Δ<sup>16,17</sup>-enol ether (**1**).

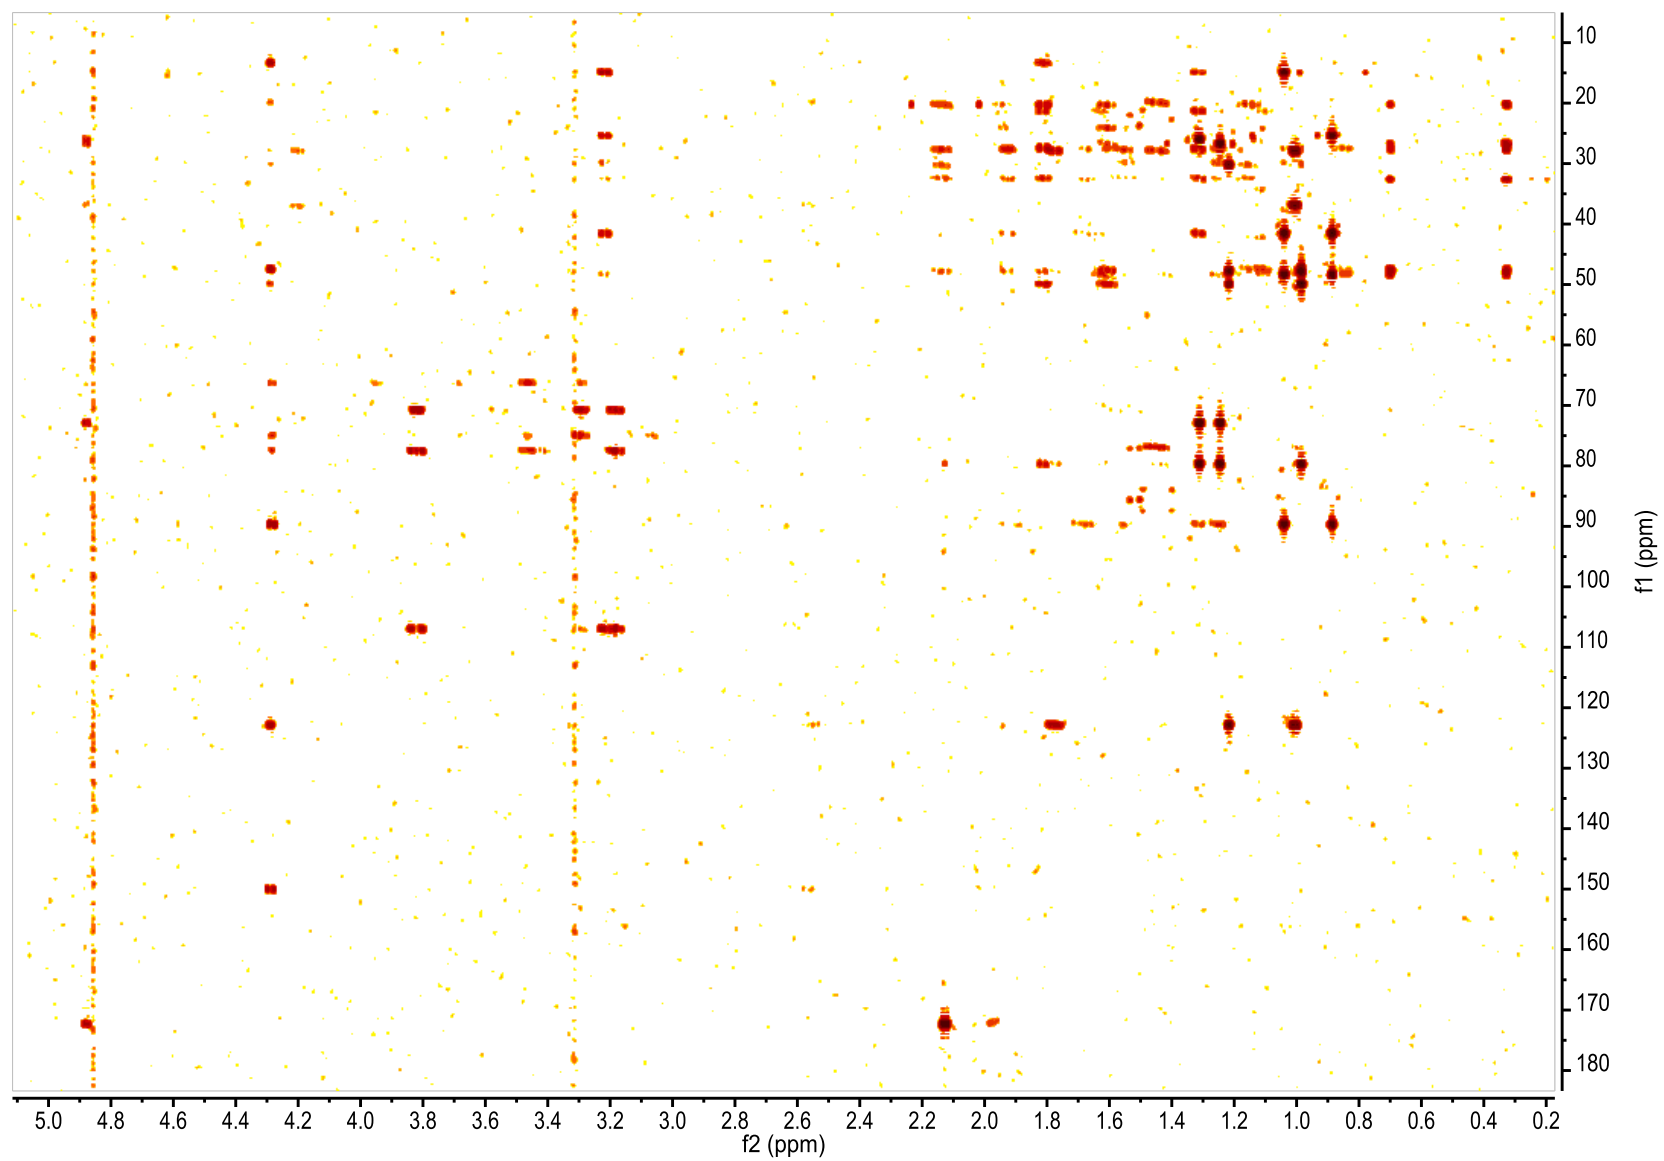

**Figure 4.** HMBC spectrum (600 MHz, methanol- $d_4$ ) of 24-O-acetylhydroshengmanol 3-O- $\beta$ -D-xylopyranoside- $\Delta^{16,17}$ -enol ether (**1**).

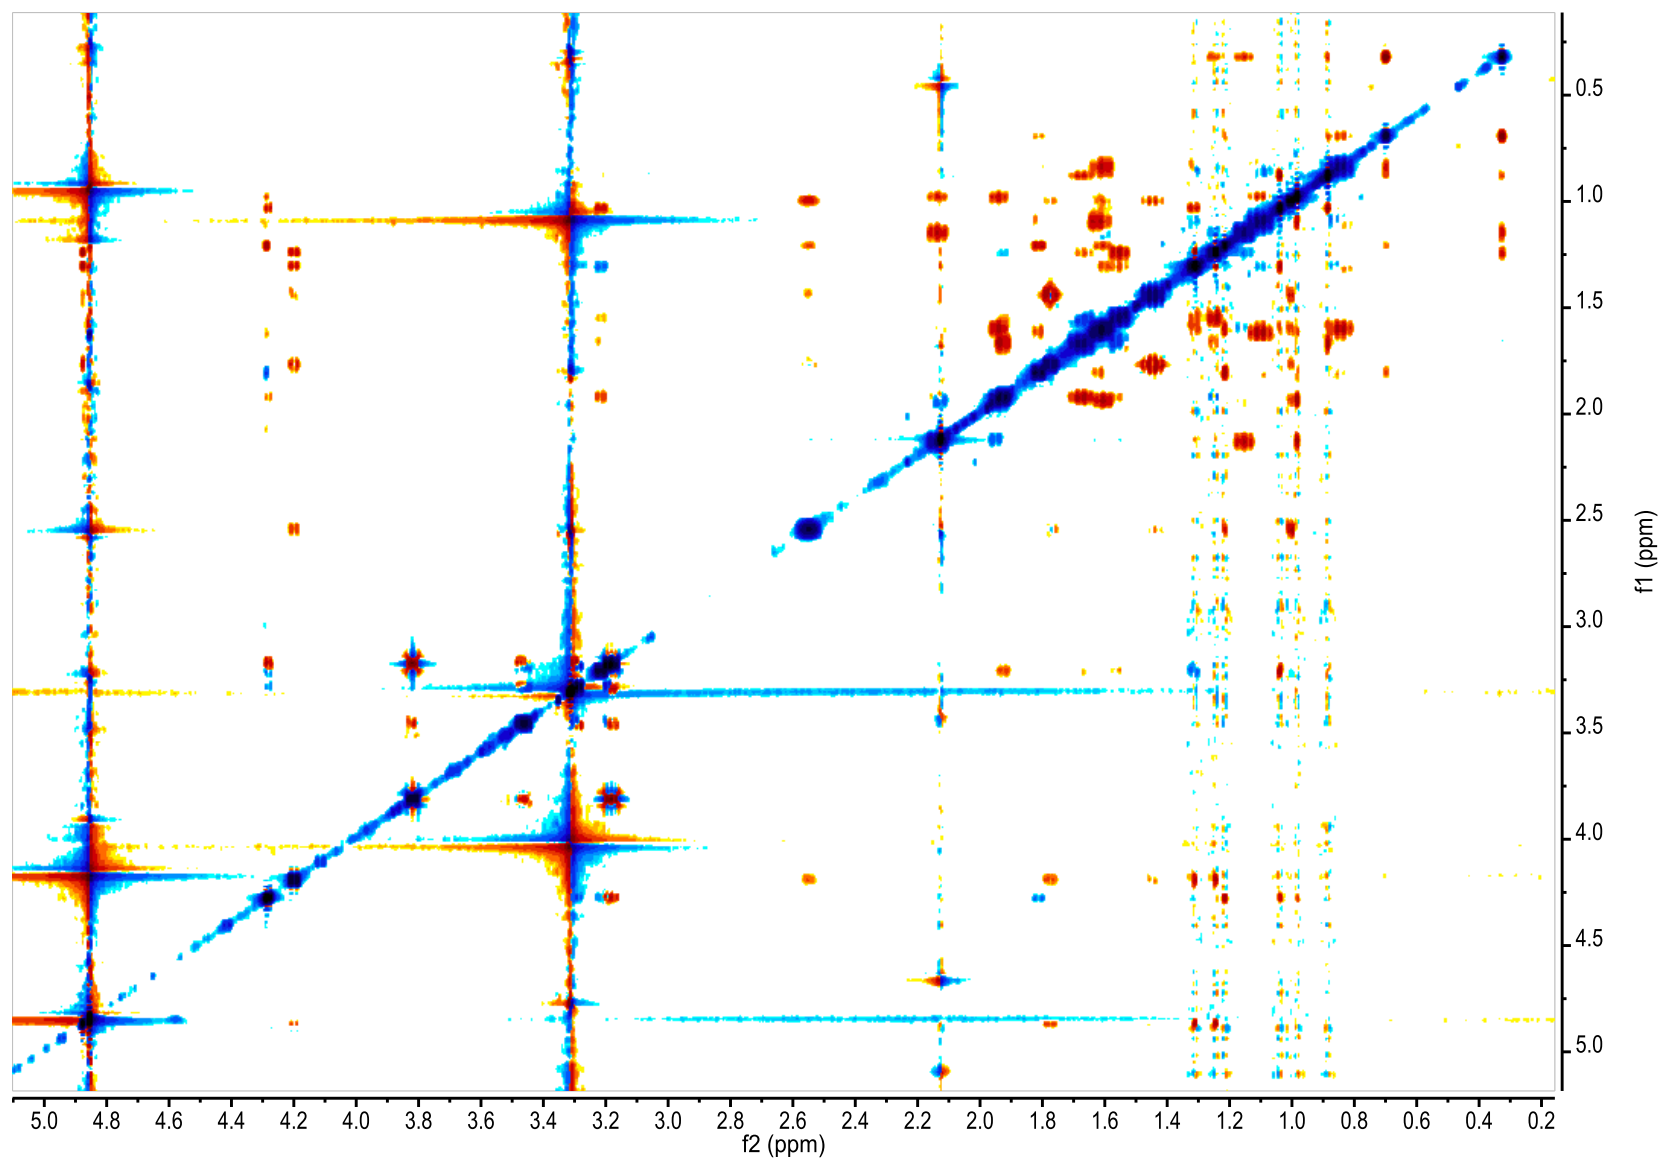

**Figure 5.** NOESY spectrum (600 MHz, methanol- $d_4$ ) of 24-O-acetylhydroshengmanol 3-O- $\beta$ -D-xylopyranoside- $\Delta^{16,17}$ -enol ether (**1**).

**Table 1.** List of compounds with alternate naming and Chemical Abstracts Service Registry

Number.

| #  | Trivial Chemical Name                                                                                           | CAS Entry Name                                                                                                                                                                                   | CAS Registry Number |
|----|-----------------------------------------------------------------------------------------------------------------|--------------------------------------------------------------------------------------------------------------------------------------------------------------------------------------------------|---------------------|
| 1  | 24- <i>O</i> -Acetylhydroshengmanol (delta-16,17)-enol ether-3- <i>O</i> -beta-D-xylopyranoside, (24S)          | $\beta$ -D-Xylopyranoside, (3 $\beta$ ,15 $\alpha$ ,23 <i>R</i> ,24 <i>S</i> )-24-(acetyloxy)-16,23-epoxy-15,25-dihydroxy-9,19-cyclolanost-16-en-3-yl                                            | 915277-86-0         |
| 2  | Actein                                                                                                          | $\beta$ -D-Xylopyranoside, (3 $\beta$ ,12 $\beta$ ,16 $\beta$ ,23 <i>R</i> ,24 <i>R</i> ,25 <i>S</i> ,26 <i>S</i> )-12-(acetyloxy)-16,23:23,26:24,25-triepoxy-26-hydroxy-9,19-cyclolanostan-3-yl | 18642-44-9          |
| 3  | Cimigenol-3- <i>O</i> -beta-D-xylopyranoside                                                                    | $\beta$ -D-Xylopyranoside, (3 $\beta$ ,15 $\alpha$ ,16 $\alpha$ ,23 <i>R</i> ,24 <i>S</i> )-16,23:16,24-diepoxy-15,25-dihydroxy-9,19-cyclolanostan-3-yl                                          | 27994-11-2          |
| 4  | Cimigenol-3- <i>O</i> -alpha-L-arabinopyranoside                                                                | $\alpha$ -L-Arabinopyranoside, (3 $\beta$ ,15 $\alpha$ ,16 $\alpha$ ,23 <i>R</i> ,24 <i>S</i> )-16,23:16,24-diepoxy-15,25-dihydroxy-9,19-cyclolanostan-3-yl                                      | 256925-92-5         |
| 5  | 24- <i>O</i> -Acetylhydroshengmanol-3- <i>O</i> -beta-D-xylopyranoside, (24S)                                   | 9,19-Cyclolanostane-15,16,24,25-tetrol, 16,23-epoxy-3-( $\beta$ -D-xylopyranosyloxy)-, 24-acetate, (3 $\beta$ ,15 $\alpha$ ,16 $\beta$ ,23 <i>R</i> ,24 <i>S</i> )-                              | 78213-32-8          |
| 6  | 24- <i>O</i> -Acetylhydroshengmanol (delta-16,17)-enol ether-3- <i>O</i> -beta-D-xylopyranoside, (24 <i>R</i> ) | $\beta$ -D-Xylopyranoside, (3 $\beta$ ,15 $\alpha$ ,23 <i>R</i> ,24 <i>R</i> )-24-(acetyloxy)-16,23-epoxy-15,25-dihydroxy-9,19-cyclolanost-16-en-3-yl                                            | 915277-88-2         |
| 7  | 24- <i>O</i> -Acetylhydroshengmanol-3- <i>O</i> -alpha-L-arabinopyranoside, (24S)                               | 9,19-Cyclolanostane-15,16,24,25-tetrol, 3-( $\alpha$ -L-arabinopyranosyloxy)-16,23-epoxy-, 24-acetate, (3 $\beta$ ,15 $\alpha$ ,16 $\beta$ ,23 <i>R</i> ,24 <i>S</i> )-                          | 915277-93-9         |
| 8  | 24- <i>O</i> -Acetylhydroshengmanol (delta-16,17)-enol ether-3- <i>O</i> -alpha-L-arabinopyranoside, (24S)      | $\alpha$ -L-Arabinopyranoside, (3 $\beta$ ,15 $\alpha$ ,23 <i>R</i> ,24 <i>S</i> )-24-(acetyloxy)-16,23-epoxy-15,25-dihydroxy-9,19-cyclolanost-16-en-3-yl                                        | 915277-87-1         |
| 9  | 24- <i>O</i> -Acetylhydroshengmanol-3- <i>O</i> -beta-D-xylopyranoside, (24 <i>R</i> )                          | 9,19-Cyclolanostane-15,16,24,25-tetrol, 16,23-epoxy-3-( $\beta$ -D-xylopyranosyloxy)-, 24-acetate, (3 $\beta$ ,15 $\alpha$ ,16 $\beta$ ,23 <i>R</i> ,24 <i>R</i> )-                              | 942578-88-3         |
| 10 | Hydroshengmanol (delta-16,17)-enol ether-3- <i>O</i> -beta-D-xylopyranoside, (24S)                              | $\beta$ -D-Xylopyranoside, (3 $\beta$ ,15 $\alpha$ ,23 <i>R</i> ,24 <i>S</i> )-16,23-epoxy-15,24,25-trihydroxy-9,19-cyclolanost-16-en-3-yl                                                       | 915277-92-8         |
| 11 | 24- <i>O</i> -Acetylhydroshengmanol (delta-16,17)-enol ether, (24S)                                             | 9,19-Cyclolanost-16-ene-3,15,24,25-tetrol, 16,23-epoxy-, 24-acetate, (3 $\beta$ ,15 $\alpha$ ,23 <i>R</i> ,24 <i>S</i> )-                                                                        | 942578-77-0         |
| 12 | Hydroshengmanol (delta-16,17)-enol ether, (24S)                                                                 | 9,19-Cyclolanost-16-ene-3,15,24,25-tetrol, 16,23-epoxy-, (3 $\beta$ ,15 $\alpha$ ,23 <i>R</i> ,24 <i>S</i> )-                                                                                    | 942578-79-2         |

## CHEMISTRY

**Synthesis of 10.** Enol ether **1** (52 mg) was dissolved in MeOH (1 mL) and methanolic KOH (2 mL, 0.5% w/v) was added. The mixture was stirred at room temperature for 3 hours and concentrated under vacuum to dryness. The residue was purified by chromatography on silica gel with MeOH-CH<sub>2</sub>Cl<sub>2</sub> (1:9 v/v) to obtain 21 mg of the des-acetyl derivative **12**. MS and NMR data were consistent with removal of the acetyl group. As an alternate procedure, **1** was treated with 1% ammonia in MeOH and heated at 85 °C for 1 hour. Solvent was removed under reduced pressure to afford **10**. MS and NMR data were consistent with removal of the acetyl group.

### Synthesis of 11

Compound **1** (10 mg) was dissolved in 5 mL of MeOH. Potassium phosphate buffer (50 mM, pH 6.0, 10 mL) was added to the MeOH solution. Cellulase (Sigma product # C0615, 20 mg) was dissolved in 10 mL of the potassium phosphate buffer solution. The solution of compound **1** was then added to the cellulase solution and the mixture was incubated for 3 days at 37° C.

Progress of the reaction was monitored by HPLC as follows: an aliquot of the reaction mixture (20 µL) was added to MeOH (80 µL) containing 0.1% acetic acid (v/v). The sample was then analyzed on a 25 cm x 4.6 mm ID SUPELCOSIL LC-8 reversed phase HPLC column (5 µm particle size) employing a 20 minute MeOH-water gradient.

After the three day incubation, 20 mL of CH<sub>2</sub>Cl<sub>2</sub> was added to the reaction mixture which was shaken vigorously followed by centrifugation at 2000 rpm for three minutes. The aqueous layer was removed and extracted two more times with 20 mL of CH<sub>2</sub>Cl<sub>2</sub>. The organic layers were combined and the solvent was removed to afford 9.6 mg of crude product. The crude product was dissolved in a minimal volume of 20:1 CH<sub>2</sub>Cl<sub>2</sub>-MeOH and chromatographed over a silica column eluted with the same solvent mixture. Column development was monitored by



TLC using a cerium molybdate stain (1%  $\text{CeSO}_4$ , 5%  $(\text{NH}_4)\text{Mo}_7\text{O}_{24}\cdot 4\text{H}_2\text{O}$  (w/v) and 10% concentrated  $\text{H}_2\text{SO}_4$  (v/v)) and a 15:1  $\text{CH}_2\text{Cl}_2$ -MeOH solvent mixture. Fractions containing material with an  $R_f$  of 0.26 were pooled to afford compound **11**. MS and NMR data were consistent with removal of the acetyl group.

**Synthesis of 12.** Acetyl aglycone **11** (12.3 mg) was dissolved in MeOH (0.4 mL) and KOH (0.5 mg) was added. The resulting mixture was stirred at room temperature overnight and then evaporated to dryness. The residue was purified by chromatography on silica gel with MeOH- $\text{CH}_2\text{Cl}_2$  (1:9 v/v) to obtain 5.4 mg of tetraol **12**. MS and NMR data were consistent with removal of the acetyl group.

**Scheme:** Black cohosh extract fractionation protocol.

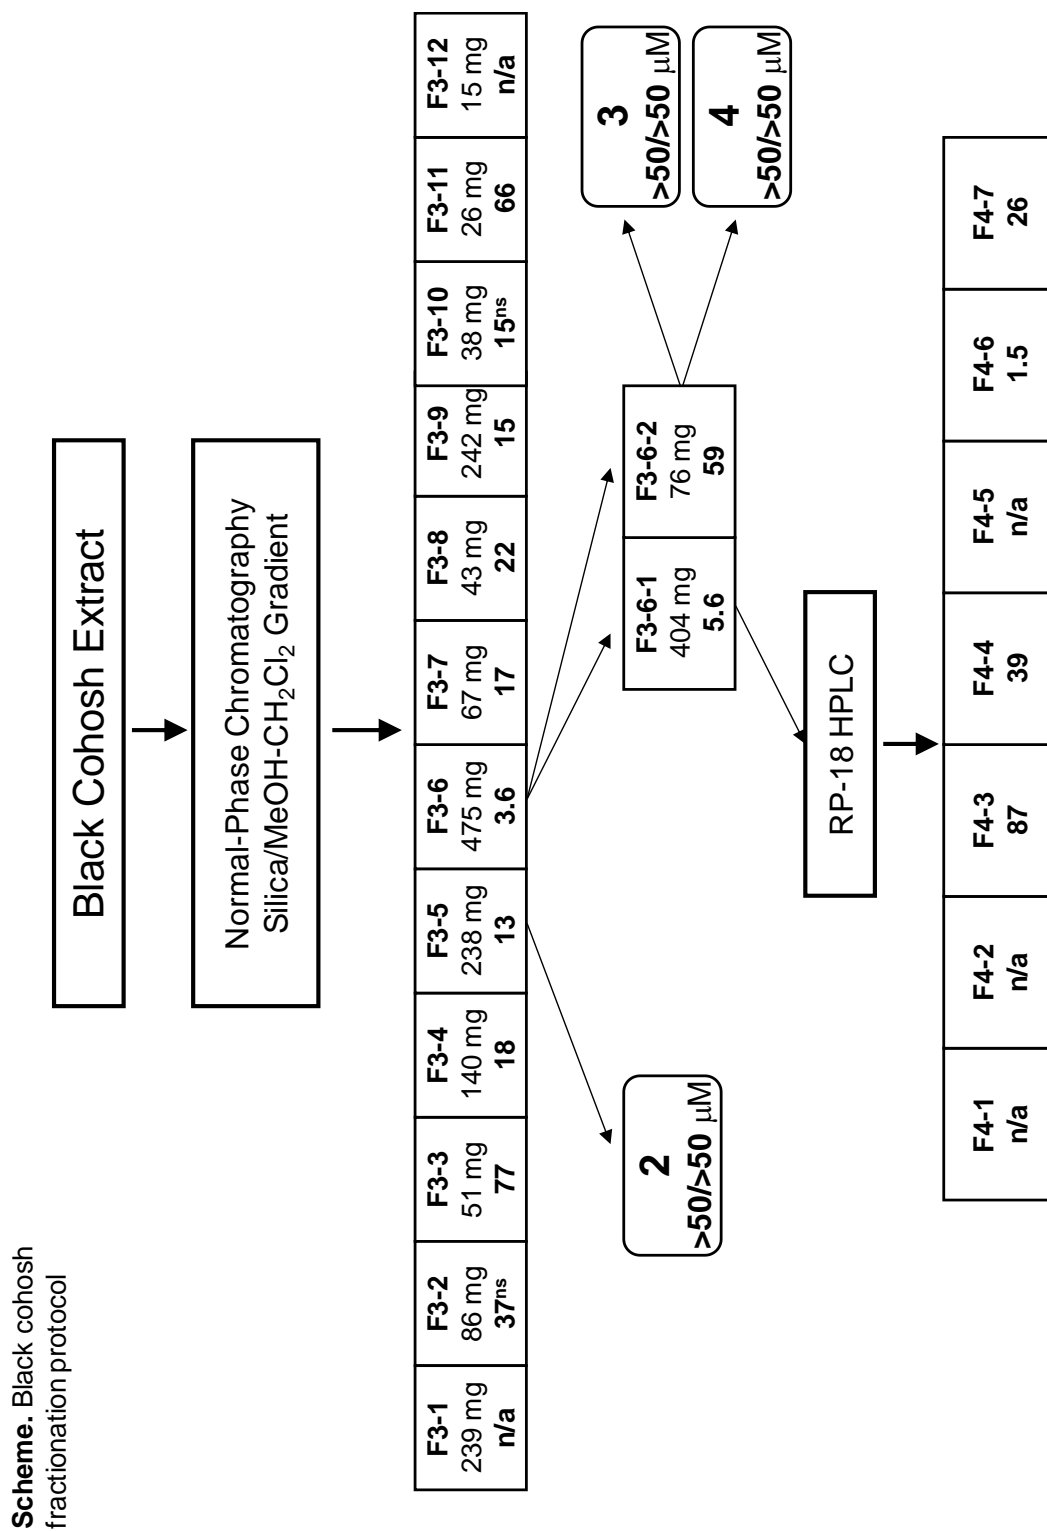

**Scheme:** Black cohosh extract fractionation protocol (continued)

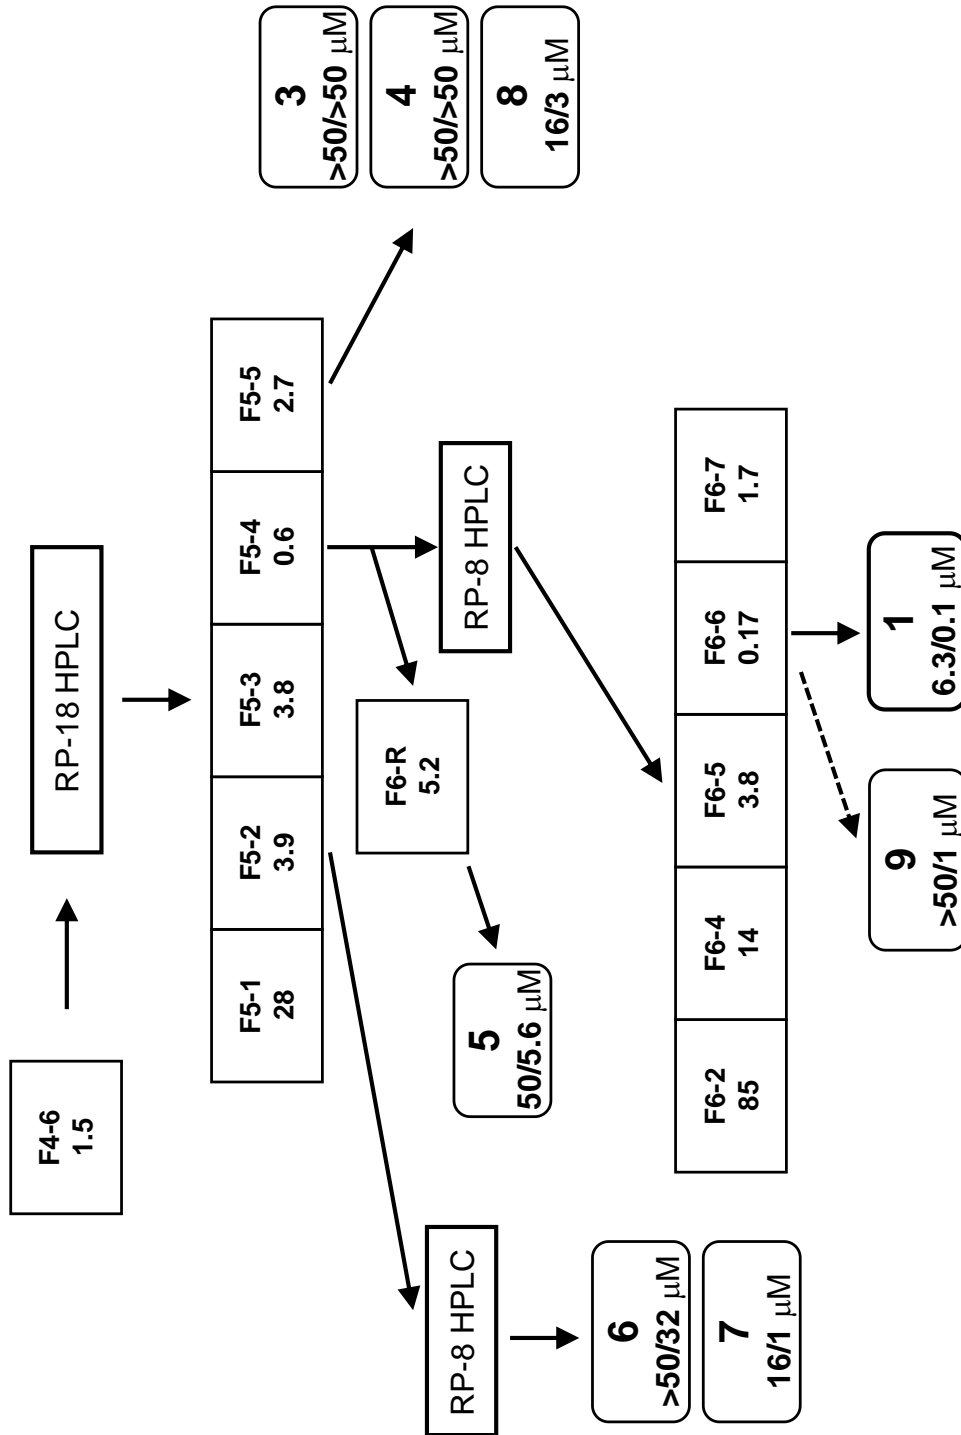

Notes: n/a: not active; <sup>ns</sup>: non-specific. Fraction activities expressed as IC50 in mg/L. Isolated compound activities expressed as IC50 in micromolar to lower Aβ40/Aβ42.

**Pharmacological selectivity screening panel assays (A). Data for 1 at 1  $\mu$ M (B), and 10  $\mu$ M (C). Values within  $\pm 20\%$  are not considered beyond baseline. Values  $\pm 20\sim 49\%$  are considered to be marginal effects. Values  $\geq 50\%$  are considered to be “active”.**

**(A) Novascreen General Side Effect Panel, 63 assays plus COX-1 and COX-2**

**NEUROTRANSMITTER RELATED**

Adenosine, Non-selective  
 Adrenergic, Alpha-1, Non-selective  
 Adrenergic, Alpha-2, Non-selective  
 Adrenergic, Beta, Non-selective  
 Dopamine Transporter, DAT  
 Dopamine, Non-selective  
 GABA-A, Agonist Site  
 GABA-A, BDZ, Alpha-1 Site  
 GABA-B  
 Glutamate, AMPA Site  
 Glutamate, Kainate Site  
 Glutamate, NMDA, Agonist Site  
 Glutamate, NMDA, Glycine [Strychnine-insensitive]  
 Glycine, Strychnine-sensitive Site  
 Histamine, H1  
 Histamine, H2  
 Histamine, H3  
 Melatonin, Non-selective  
 Muscarinic, M1 (hr)  
 Muscarinic, M2 (hr)  
 Muscarinic, Non-selective, Central  
 Muscarinic, Non-selective, Peripheral  
 Nicotinic [ $\alpha$ -Bungarotoxin Insensitive, Neuronal]  
 Norepinephrine Transporter, NET  
 Opioid, Non-selective  
 Orphanin-1 (hr)  
 Serotonin Transporter, SERT  
 Serotonin, Non-selective  
 Sigma, Non-selective, Classical

**STEROIDS**

Estrogen  
 Testosterone, Cytosolic

**ION CHANNELS**

Calcium Channel, Type L (Dihydropyridine Site)  
 Calcium Channel, Type N  
 Potassium Channel, ATP Sensitive (KATP)  
 Potassium Channel, Ca<sup>2+</sup> Activated, V1

Potassium Channel, I[Kr], hERG (hr)  
 Sodium channel, Site 2

**SECOND MESSENGERS**

Nitric Oxide Synthase, NOS (neuronal-binding)

**PROSTAGLANDINS**

Leukotriene, LTB4 (BLT)  
 Leukotriene, LTD4 (CysLT1)  
 Thromboxane, TXA2 (h)

**GROWTH FACTORS/HORMONES**

Corticotropin Releasing Factor, Non-Selective  
 Oxytocin  
 Platelet Activating Factor, PAF  
 Thyrotropin Releasing Factor, TRH

**BRAIN/GUT PEPTIDES**

Angiotensin II, AT1 (h)  
 Angiotensin II, AT2, Central  
 Bradykinin, BK2  
 Cholecystokinin, CCKA  
 Cholecystokinin, CCKB  
 Endothelin, ETA (h)  
 Endothelin, ETB (h)  
 Galanin, Non-Selective  
 Neurokinin, NK1  
 Neurokinin, NK2, NKA (hr)  
 Neurokinin, NK3, NKB  
 Vasoactive Intestinal Peptide, Non-selective  
 Vasopressin, V1

**ENZYMES**

Choline Acetyl Transferase, ChAT  
 Esterase, Acetylcholine  
 Glutamic Acid Decarboxylase, GAD  
 Oxidase, MAO-A, peripheral  
 Oxidase, MAO-B, peripheral  
 Oxygenase, Cyclooxygenase-1  
 Oxygenase, Cyclooxygenase-2

(A)

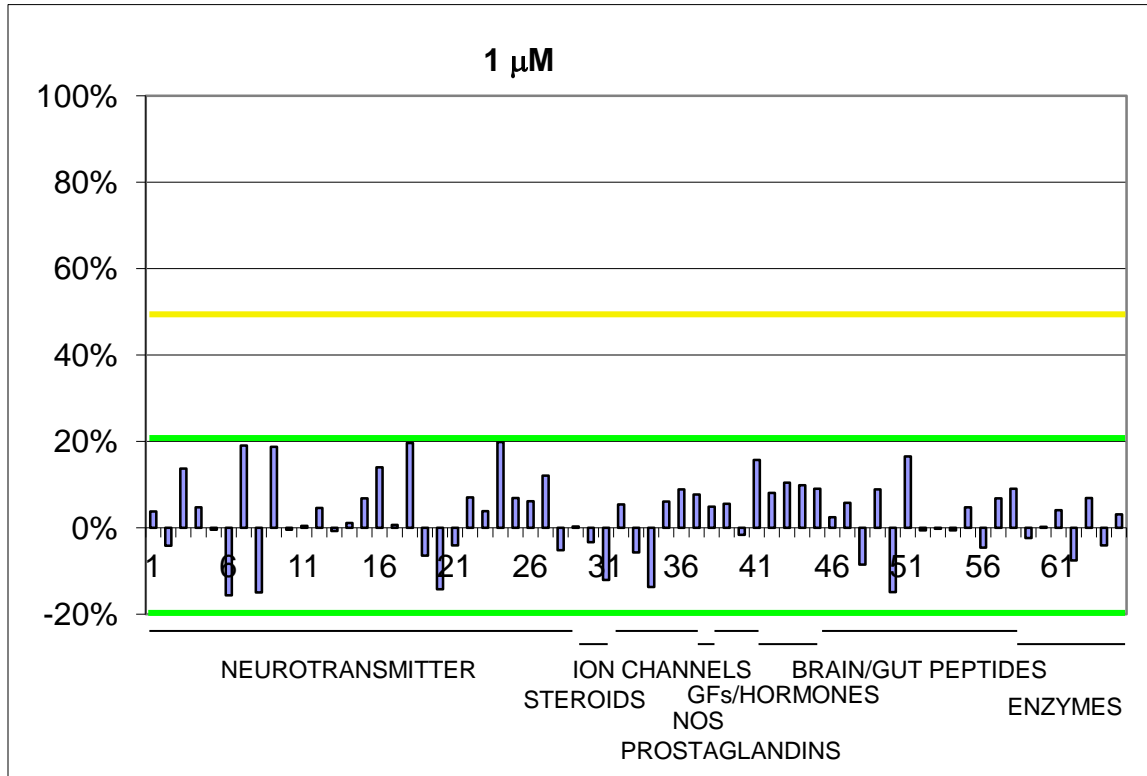

(B)

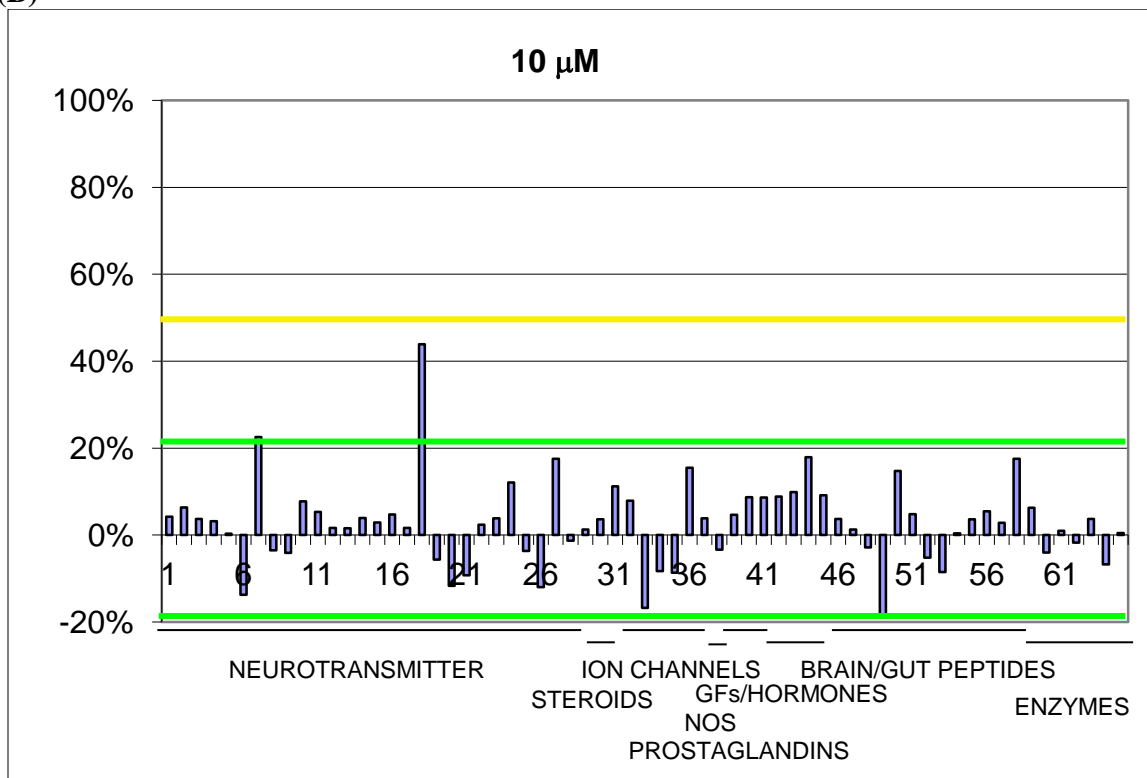

**Analytical Method for PK analyses.**

| <b>Sample Preparation</b> |                                                                                                                                                                                |
|---------------------------|--------------------------------------------------------------------------------------------------------------------------------------------------------------------------------|
| Sample Volume             | 50 $\mu$ L mouse plasma, 10 $\mu$ L mouse brain homogenates                                                                                                                    |
| Extraction                | Protein Precipitation                                                                                                                                                          |
| <b>Sample Analysis</b>    |                                                                                                                                                                                |
| Number of Standards       | 9 concentrations (1 - 10,000 ng/m), front and back end                                                                                                                         |
| HPLC Pump                 | LC_01 (Rheos CPS-LC 2000)                                                                                                                                                      |
| HPLC Column               | Agilent SB C8 column, 2.0 x 30 mm                                                                                                                                              |
| Mobile Phase A            | 100% H <sub>2</sub> O, 0.1% formic acid                                                                                                                                        |
| Mobile Phase B            | 90/10 ACN/H <sub>2</sub> O, 0.1 % formic acid                                                                                                                                  |
| Flow Rate                 | 0.45 mL/min                                                                                                                                                                    |
| Injection Volume          | 5 $\mu$ L                                                                                                                                                                      |
| MS                        | MS_01 (API4000)                                                                                                                                                                |
| Interface                 | TIS positive                                                                                                                                                                   |
| Scan                      | Multiple Reaction Monitoring (MRM)                                                                                                                                             |
| Analyte: P/D Ion Pair     | Cmpd 5: 685.7 (M+Na) <sup>+</sup> /528.6<br>Cmpd 10: 553.5 (M+Na) <sup>+</sup> /395.4<br>Cmpd 11 511.7 (M+Na) <sup>+</sup> /395.5<br>Cmpd 12: 643.6 (M+Na) <sup>+</sup> /527.6 |
| IS: P/D Ion Pair          | Amiodarone: 646.2/100.2                                                                                                                                                        |
| Resolution                | Low                                                                                                                                                                            |
| Source Temp               | 500°C                                                                                                                                                                          |
| Total Run Time            | 2 minutes                                                                                                                                                                      |

| Time (min) | % Mobile Phase B | Flow Rate ( $\mu$ L/min) |
|------------|------------------|--------------------------|
| 0          | 10               | 450                      |
| 0.1        | 10               | 450                      |
| 0.5        | 100              | 450                      |
| 1.3        | 100              | 450                      |
| 1.4        | 10               | 450                      |
| 2          | 10               | 450                      |

**Three-step procedure for the isolation of compounds 1, 5, 6, 7, 8, 9.**

(1) (24*S*)-24-O-acetylhydroshengmanol 3-O-beta-D-xylopyranoside (delta-16,17)-enol ether

(5) (24*S*)-24-O-acetylhydroshengmanol 3-O-beta-D-xylopyranoside

(6) (24*R*)-24-O-acetylhydroshengmanol 3-O-beta-D-xylopyranoside (delta-16,17)-enol ether

(7) (24*S*)-24-O-acetylhydroshengmanol 3-O-beta-D-arabinopyranoside

(8) (24*S*)-24-O-acetylhydroshengmanol 3-O-beta-D-arabinopyranoside (delta-16,17)-enol ether

(9) (24*R*)-24-O-acetylhydroshengmanol 3-O-beta-D-xylopyranoside

**1. Flash column chromatography.**

Black cohosh raw extract was obtained from BI Nutraceuticals. Extract (15.6 g) was suspended in 150 ml of a 4-to-1 (v/v) methanol-water mixture at 25 °C. Using a mechanical stirrer, the resulting slurry was vigorously stirred for 30 min at this temperature, which resulted in a brown emulsion. To this emulsion, 51 g of silica gel (ICN silica 32-63 60 Å) was added with continued stirring. Subsequently, the mixture was concentrated at 25 °C in vacuo using a rotary evaporator, until a largely homogenous beige-brown powder was obtained. This material was subjected to column chromatography on silica gel (ICN silica 32-63 60 Å) using a 60 cm long glass column with 50 mm inner diameter.

In preparation for the column chromatography, silica gel was poured into 500 ml of a 20-to-1 dichloromethane-methanol mixture, and the resulting slurry was poured into the glass column. Special care was taken to ensure a dense and even filling of the column. The silica gel was allowed to settle for 30 min, and covered with a 1 cm thick layer of sand. Subsequently, the extract absorbed on silica was poured in a suitable amount of the 20-to-1 dichloromethane-

methanol mixture, and the resulting slurry was carefully poured onto the sand layer on top of the column.

The silica column was eluted with 1.0 l of dichloromethane-methanol 20-to-1, followed by 770 ml of dichloromethane-methanol 10-to 1, followed by 800 ml of dichloromethane-methanol 7-to-1, followed by 550 ml of dichloromethane-methanol 5-to-1. For elution, a pressure of 0.4 bar (argon) was applied.

Fractions were collected using Erlenmeyer flasks. Eight 200 ml-fractions (labeled as F14-0 through F14-7) were collected, followed by eleven 100-ml fractions (labeled as F14-8 through F14-18). All fractions were analyzed by thin-layer chromatography (TLC), using Bakerflex silica plates, and a 5-to-1 dichloromethane-methanol mixture as solvent. After development the silica gel plates were stained with anisaldehyde stain (see Figure 1a). Based on the results of the TLC analyses, fractions F14-9 through F14-12 were evaporated to dryness in vacuo at 25 °C, and 10-mg samples of these fractions were analyzed by <sup>1</sup>H-NMR spectroscopy, using CD<sub>3</sub>OD as solvent (Figure 2a). Spectra were analyzed with regard to the presence of a broad multiplet at 2.53 ppm, and a 2.2-Hz doublet at 4.86 ppm, because these signals are characteristic for compounds **1** and **7**. Additional dqf-COSY spectra of these four samples confirmed that the signals at 2.53 and 4.86 ppm in fact belong to compounds **1** and **8**. From the NMR spectra of fraction F14-10 it was concluded that this sample contained the highest concentration of **1** and **7**, while slightly smaller amounts of these compounds could be detected in fraction F14-9. Fraction F14-11 appeared to contain traces of **1** and **8**, whereas these compounds could not be detected in fraction F14-12. Based on these results, fraction F14-10 was chosen for further purification via HPLC. Fraction F14-9 could be used in addition, in case larger amounts of compounds **1**, **5**, **7**, or **8** are needed.



Amounts of fractions F14-9 through F14-12:

F14-9: 190 mg

F14-10: 287 mg

F14-11: 354 mg

F14-12: 215 mg

Major component of fraction F14-10 was actein (JNP 2002, 65, 601-605), which crystallized from a methanolic solution of this fraction. Pure actein was obtained through recrystallization.

Major components of fraction F14-11 were cimigenol beta-D-xylopyranoside (**3**) and cimigenol alpha-L-arabinoside (**4**), which crystallized from this fraction as a mixture of roughly 2:1 (JNP 2000, 65, 905-910 and 1391-1397).

## **2. Reversed-phase HPLC fractionation on C-18 column.**

Fraction F14-10 was dissolved in 3.5 ml of methanol. This solution was fractionated by HPLC using a SUPELCO Discovery RP-18 column (25 cm length, 10 mm inner diameter), and a AGILENT 1100 series HPLC system, including autoinjector and a diode array detector used for detection of wavelength from 190-400 nm. A solvent gradient was employed, starting with 30% (v/v) water in methanol for the first two minutes, followed by a linear decrease of water content reaching 100% methanol at 20 min. After 2 min at 100 % methanol, water content was increased to 30% and maintained at that concentration for another 8 min. For separation of the entire sample F14-10, 100 injections of 35 µl each were required. Nine fractions were collected, which were labeled F15-1 through F15-9 (Figure 3a). Compounds **1**, **5**, **7**, and **8** were eluted in fractions F15-1, 15-2, 15-4 and 15-5:

F15-1: 44.3 mg (contains **7** as one of two major compounds)

F15-2: 4.0 mg (major component is **7**, second most abundant component is **8**)

F15-4: 20.3 mg (major component: **5**, about 80% pure)

F15-5: 13.6 mg (mixture of **1** and **5** in a ratio of roughly three-to-two, plus small amounts of **6**)

F15-8: 10.5 mg (contains **9** as a major component)

<sup>1</sup>H NMR spectra of fractions F15-1, 15-2, 15-4 and 15-5 are shown in Figure 4a and 4b.

### **3. Reversed-phase HPLC fractionation on C-8 column for the isolation of **1**, **5**, and **6**.**

Fraction F15-5 was dissolved in 1.5 ml of methanol. This solution was fractionated by HPLC using a SUPELCO supelcosil LC-8 column (25 cm length, 10 mm inner diameter), and the AGILENT 1100 series HPLC system described above. A solvent gradient was employed, starting with 40% (v/v) water in methanol for the first two minutes, followed by a linear decrease of water content reaching 100% methanol at 20 min. After 2 min at 100 % methanol, water content was increased to 40% and maintained at that concentration for another 8 min. For separation of the entire sample F15-5, 50 injections of 30 µl each were required. Five fractions were collected, which were labeled F16-1 through F16-5 (Figure 5). Compound **1** was eluted in fraction F16-3, whereas compound **5** eluted in fraction F16-1. A small amount of pure **6** was obtained in fraction F15-5. Figure 6 shows the <sup>1</sup>H NMR spectrum of the 9.8 mg of 98% pure **1** obtained.

Amounts obtained:

F16-1: 14.3 mg of pure **5**.

F16-3: 7.1 mg of pure **1**.

F16-5: 0.5 mg of pure **6**.

### **4. Reversed-phase HPLC fractionation on C-8 column for the isolation of **9**.**

Fraction F15-8 was dissolved in 0.65 ml of methanol. This solution was fractionated by HPLC using a SUPELCO supelcosil LC-8 column (25 cm length, 10 mm inner diameter), and the

AGILENT 1100 series HPLC system described above. A solvent gradient was employed, starting with 40% (v/v) water in methanol for the first two minutes, followed by a linear decrease of water content reaching 100% methanol at 20 min. After 2 min at 100 % methanol, water content was increased to 40% and maintained at that concentration for another 8 min. For separation of the entire sample F15-8, 22 injections of 30  $\mu$ l each were required. Seven fractions were collected, which were labeled F18-1 through F18-7. Compound **9** was eluted in fraction F18-6. 2.5 mg of compound **9** were obtained. NMR-spectroscopic analyses including NOESY spectra showed that in methanolic solution compound **9** interconverts with the corresponding ketone. Dilute methanolic solutions contain about 4% ketone and 96% of the hemiacetal form.

#### **5. Reversed-phase HPLC fractionation on C-8 column for the isolation of **7** and **8**.**

Fraction F15-2 was dissolved in 0.5 ml of methanol. This solution was fractionated by HPLC using a SUPELCO supelcosil LC-8 column (25 cm length, 10 mm inner diameter), and the AGILENT 1100 series HPLC system described above. A solvent gradient was employed, starting with 40% (v/v) water in methanol for the first two minutes, followed by a linear decrease of water content reaching 100% methanol at 20 min. After 2 min at 100 % methanol, water content was increased to 40% and maintained at that concentration for another 8 min. For separation of the entire sample F15-2, 17 injections of 30  $\mu$ l each were required. Five fractions were collected, which were labeled F19-3 through F19-7. Pure **8** (0.5 mg) was obtained in fraction F19-7, whereas pure **7** (2.3 mg) was obtained in fraction F19-5.

**Figure 1a.** Silica gel fractionation of black cohosh extract. TLC of fractions F14-3 through F14-18.

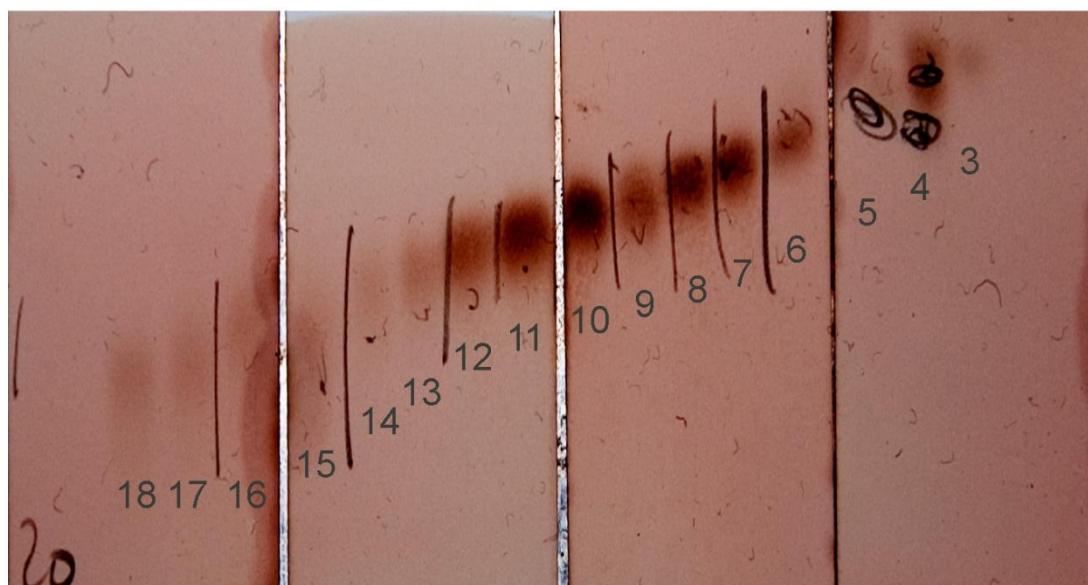

**Figure 2a.**  $^1\text{H}$  NMR spectra of fractions F14-9 and F14-10.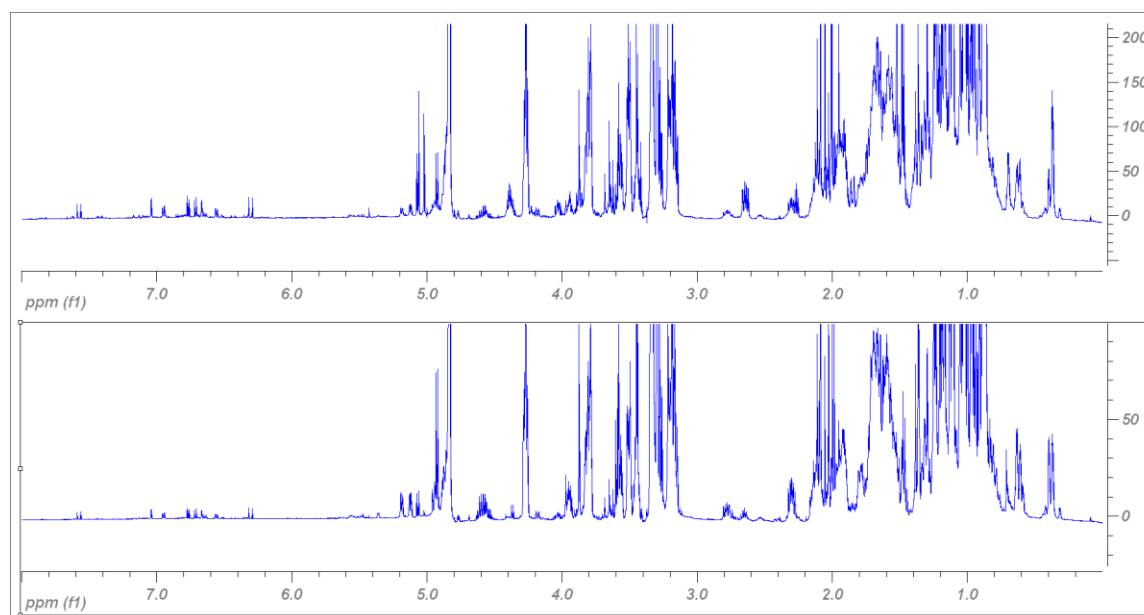**Figure 2b.**  $^1\text{H}$  NMR spectra of fractions F14-11 and F14-12.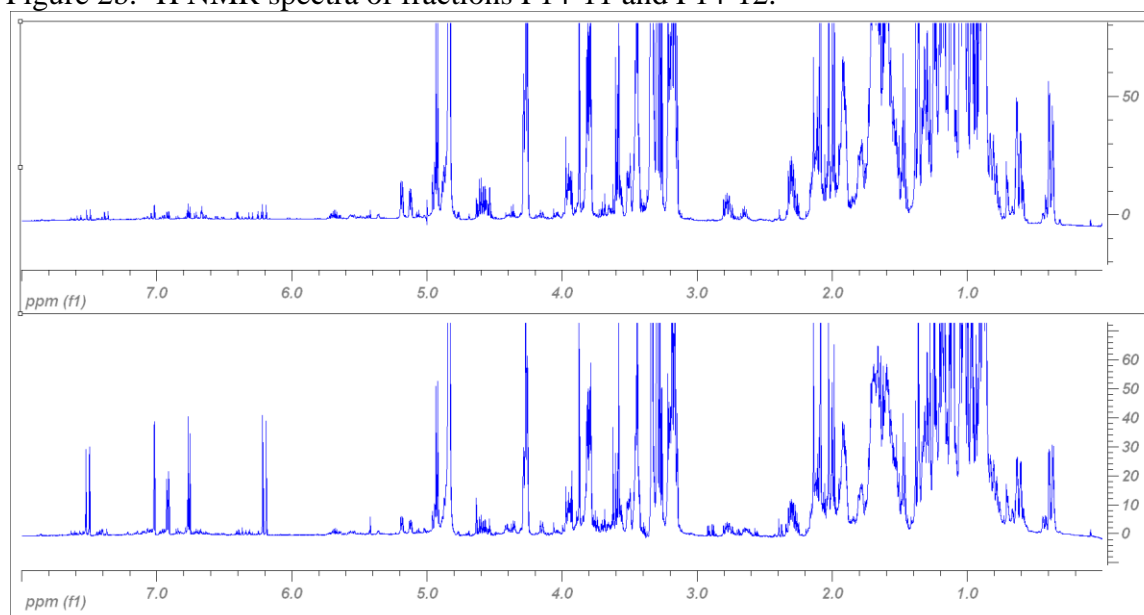

**Figure 3a.** Chromatogram of RP-18 HPLC separation of F14-10.

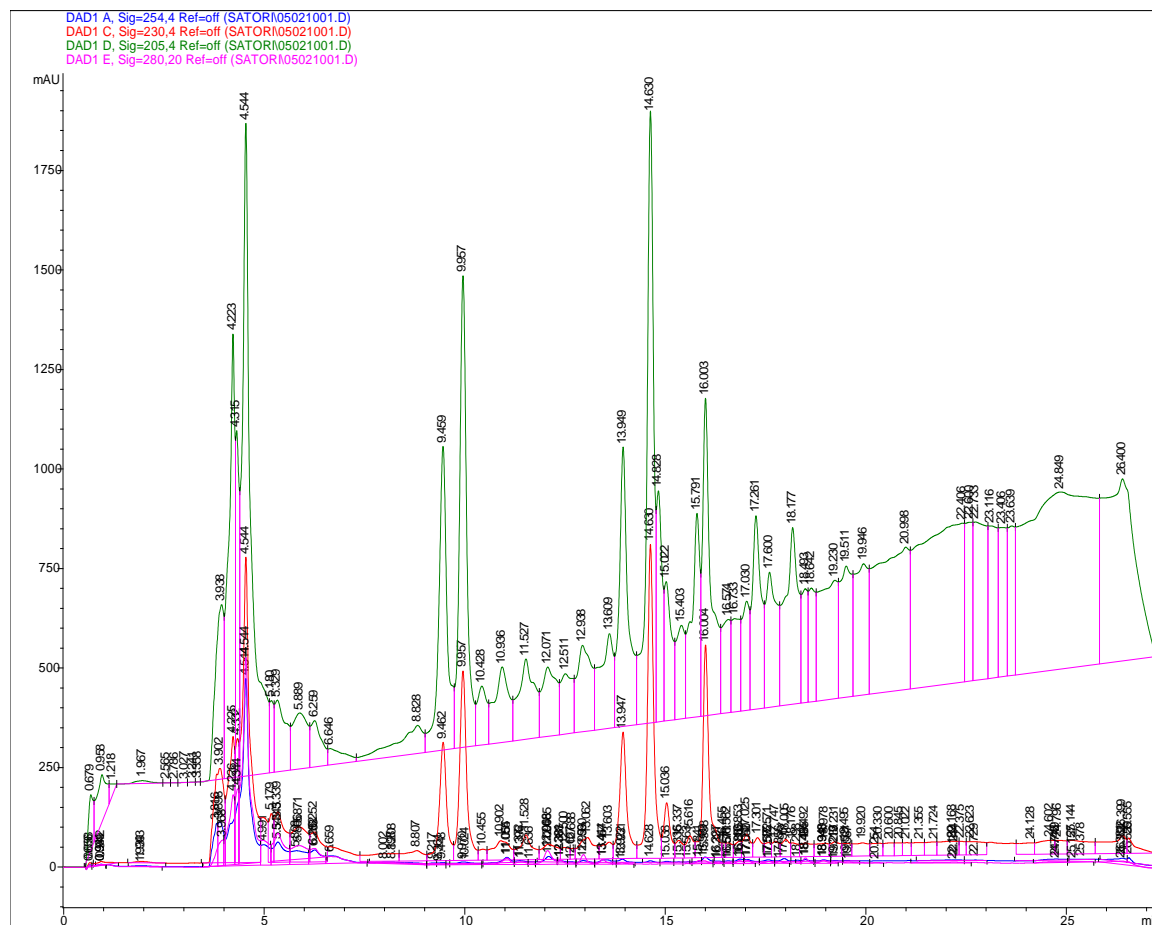

**Figure 3b.** Enlargement of chromatogram of F14-10 separation. Numbers 1 through 9 correspond to time windows for fractions F15-1 through F15-9.

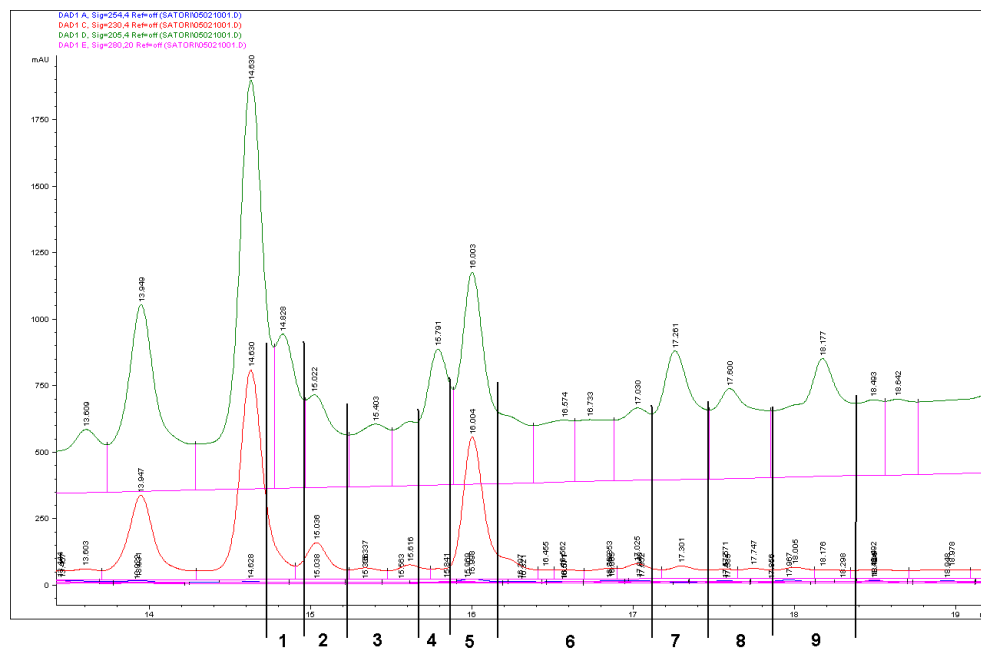

**Figure 4a.**  $^1\text{H}$  NMR spectra of fractions F15-1 (top) and F15-2 (bottom).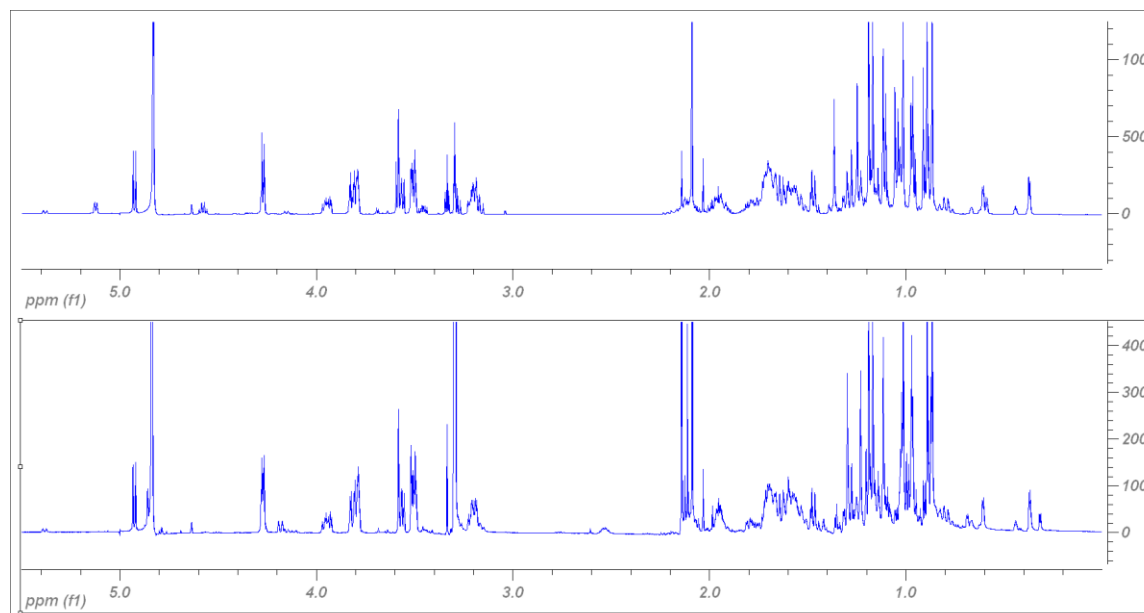**Figure 4b.**  $^1\text{H}$  NMR spectra of fractions F15-4 (top) and F15-5 (bottom).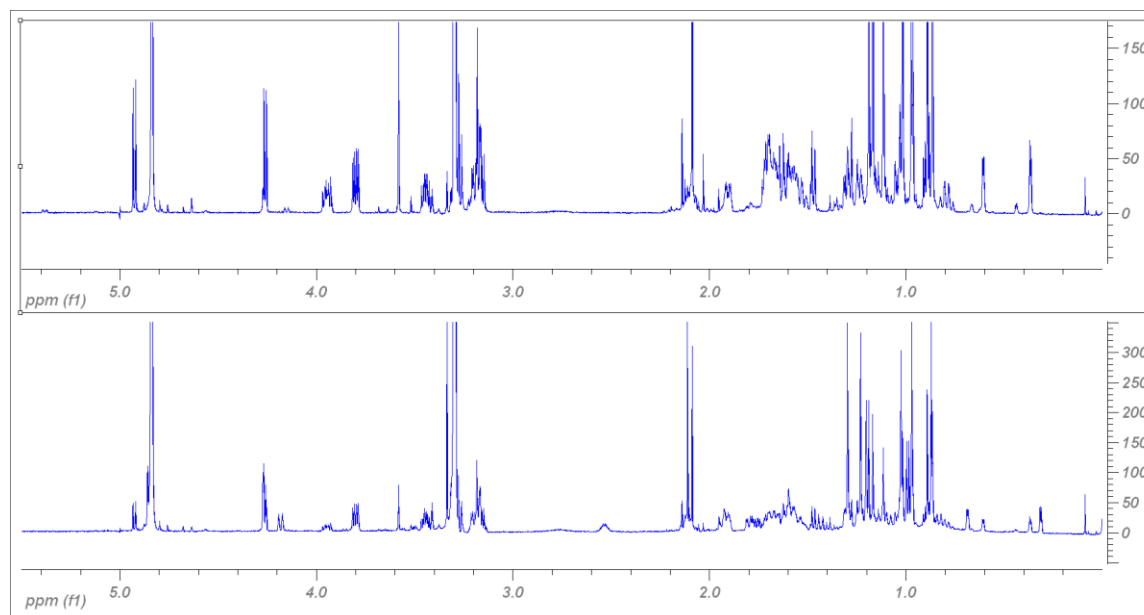



**Figure 5a.** Chromatogram of RP-18 HPLC separation of F15-5.

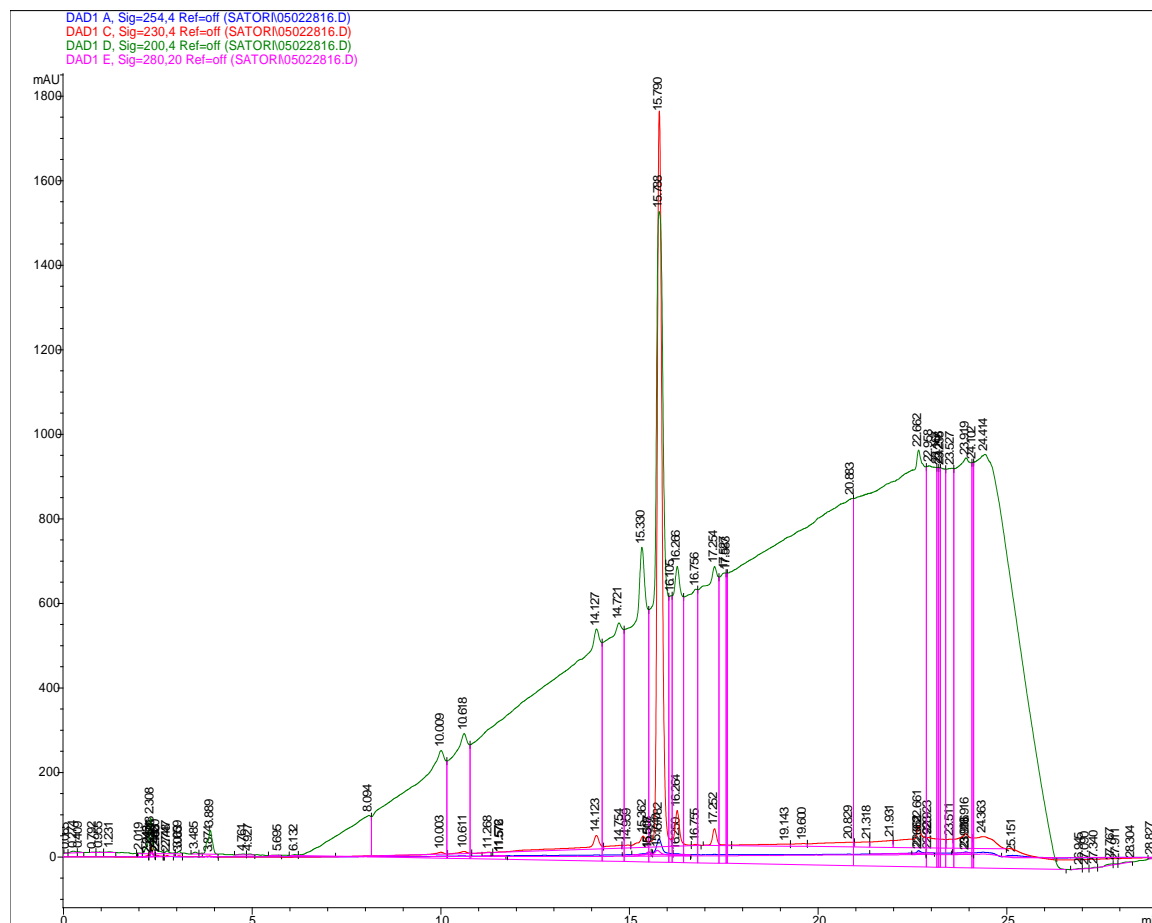

**Figure 5b.** Enlargement of chromatogram of F15-5 separation. Numbers 1 through 5 correspond to time windows for fractions F16-1 through F16-5.

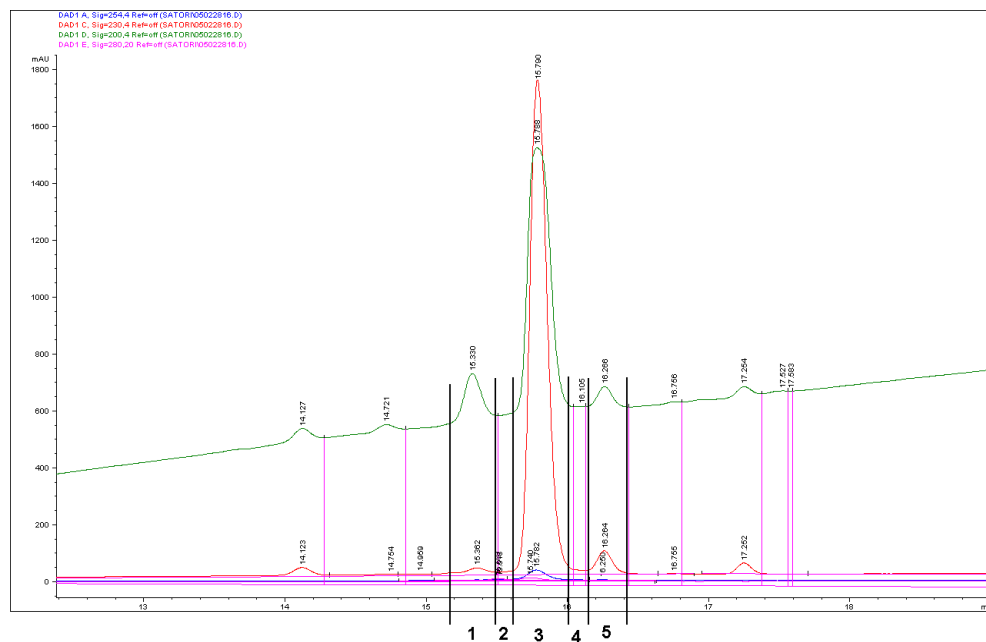

**Figure 6.**  $^1\text{H}$  NMR spectrum of fraction F16-3 (98% pure **1**).

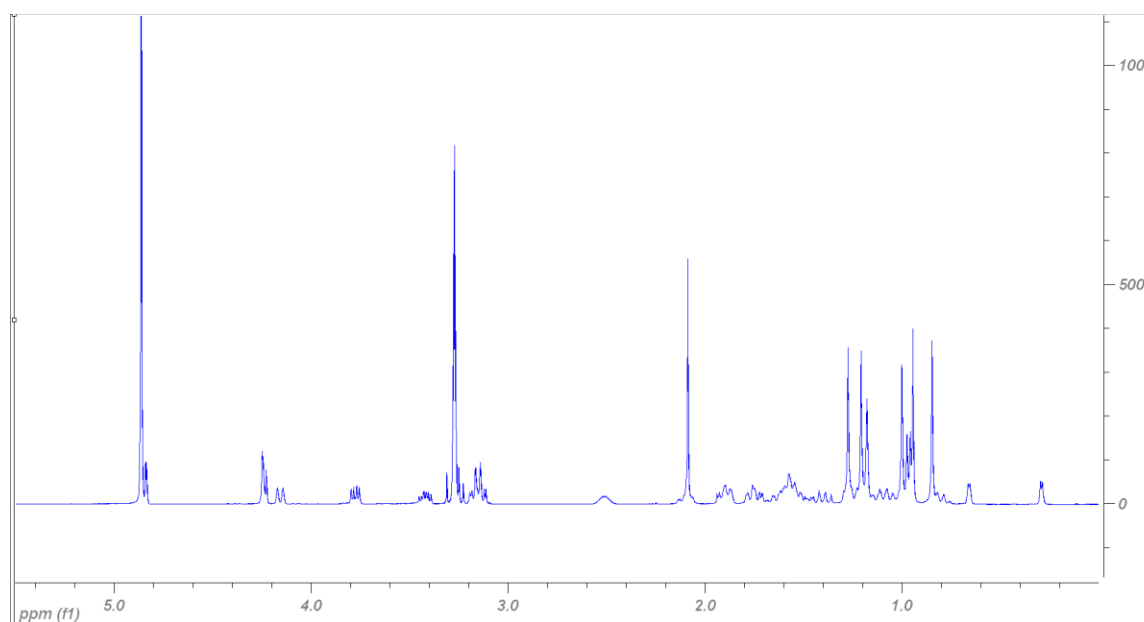

**IP-MS analysis of A $\beta$ (1-X) of cell-conditioned medium.** CHO-7w and CHO-7PA2 cells cultured in DMEM/10% fetal bovine serum were plated in 10-cm dishes and treated during 24 h with DMSO as vehicle control, **1** (0.1, 1  $\mu$ M), the  $\gamma$ -secretase inhibitor DAPT (20  $\mu$ M), or the  $\gamma$ -secretase modulator sulindac sulfide (100  $\mu$ M). The conditioned media were harvested and frozen for subsequent analysis. IP-MS analysis for A $\beta$ (1-X) was performed as previously described.<sup>30,31</sup>

Treatment with compound **1** lowered the level of A $\beta$ 42 and increased the proportion of A $\beta$ 37 and A $\beta$ 39 in both cell lines. DAPT lowered the production of total A $\beta$  as did sulindac sulfide at the concentration tested.

Mass spectral data attached:

For CHO-7W and CHO-7PA2 cells, data are shown for treatment with:

- 1) DMSO vehicle control
- 2) Compound **1** (100 nM)
- 3) Compound **1** (1  $\mu$ M)
- 4) DAPT (20  $\mu$ M)
- 5) Sulindac sulfide (100  $\mu$ M)

# 7W samples

**DMSO vehicle control**

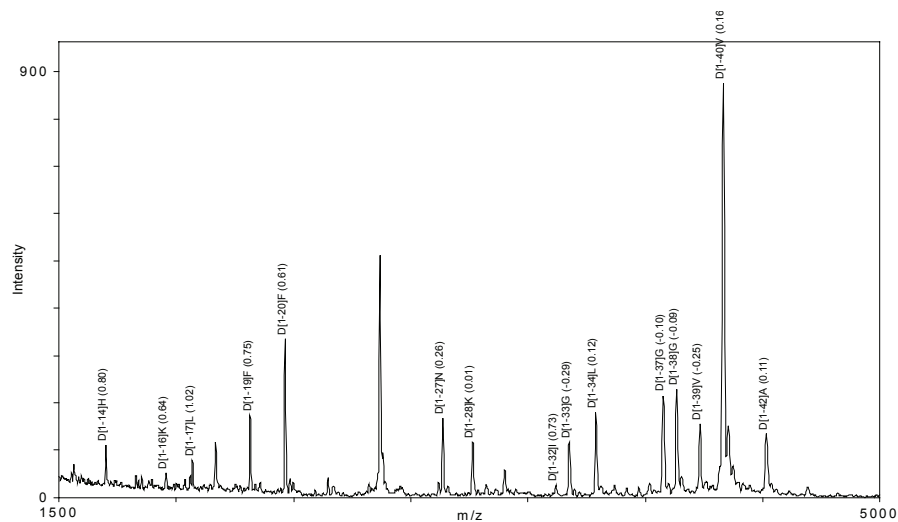

**Compound 1  
100 nM**

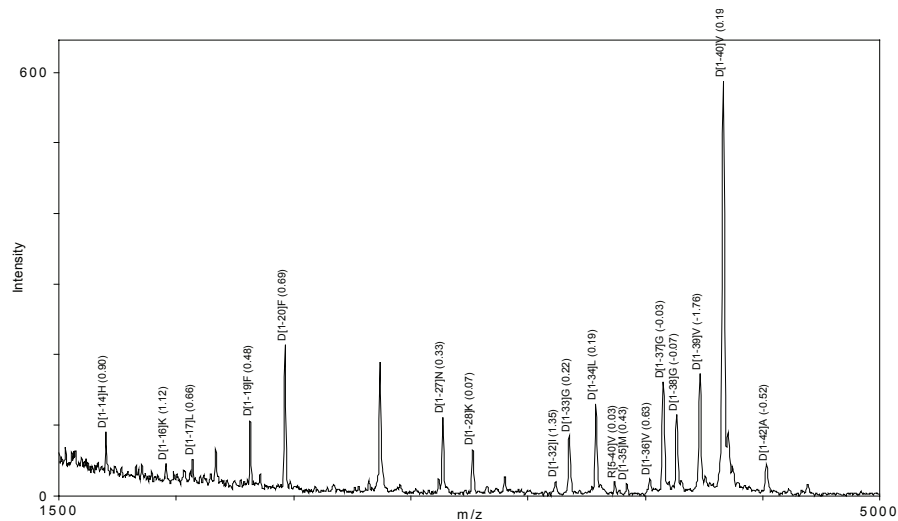

**Compound 1  
1 μM**

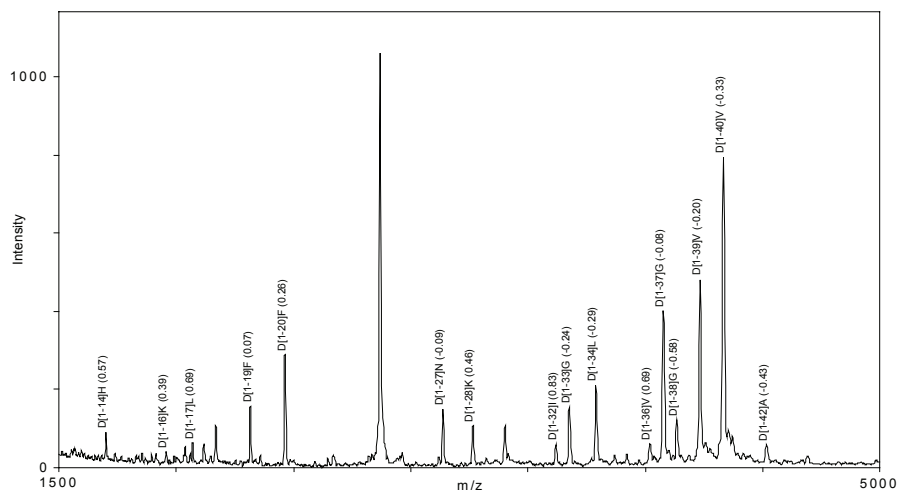

# 7W samples

**DATP**  
**20  $\mu\text{M}$**

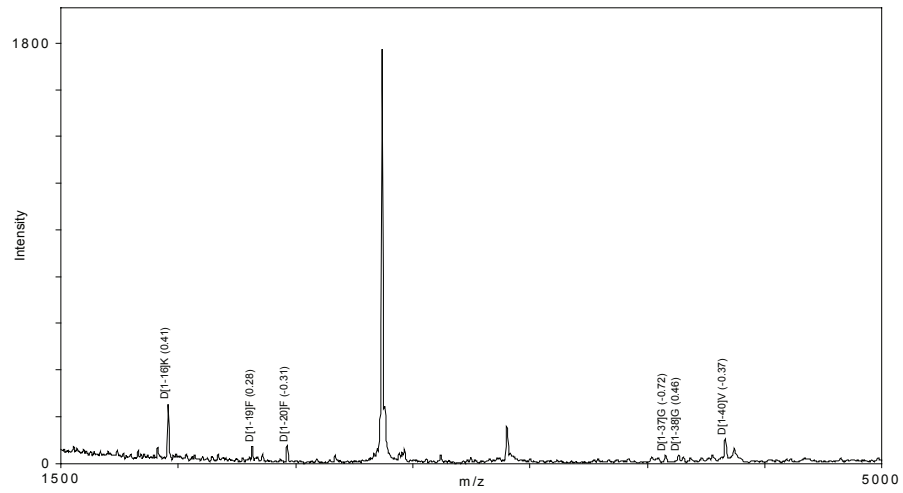

**Sulindac sulfide**  
**100  $\mu\text{M}$**

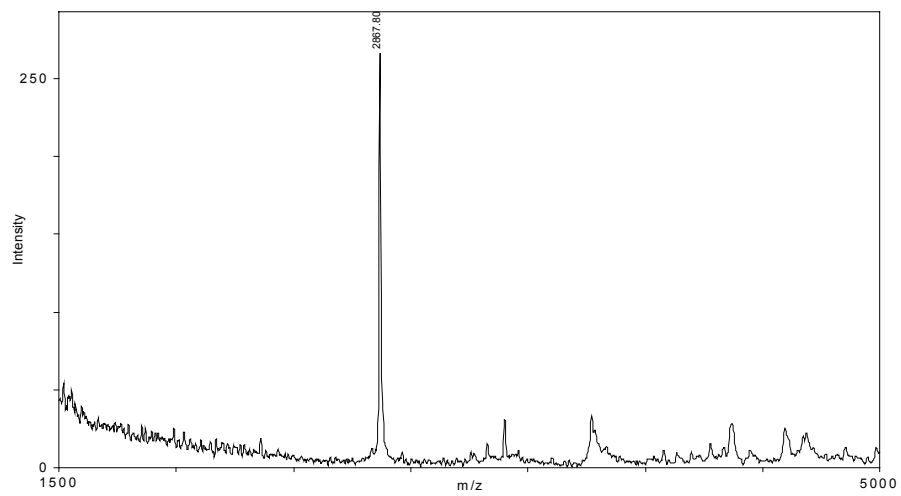

# 7PA2 samples

**DMSO vehicle  
control**

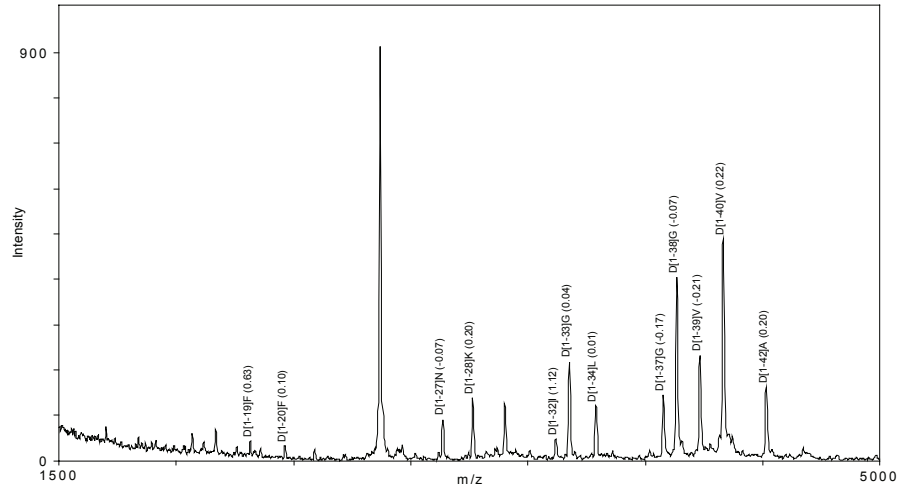

**Compound 1  
100 nM**

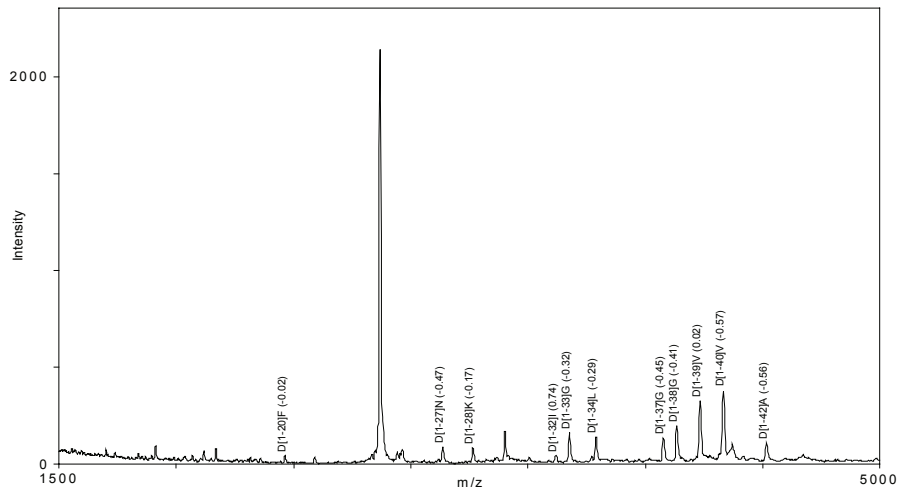

**Compound 1  
1  $\mu$ M**

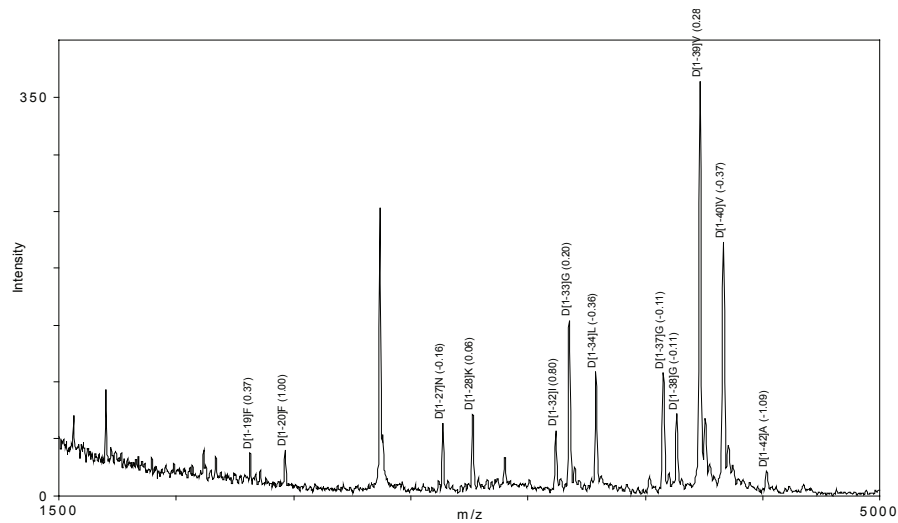

# 7PA2 samples

**DATP**  
**20  $\mu$ M**

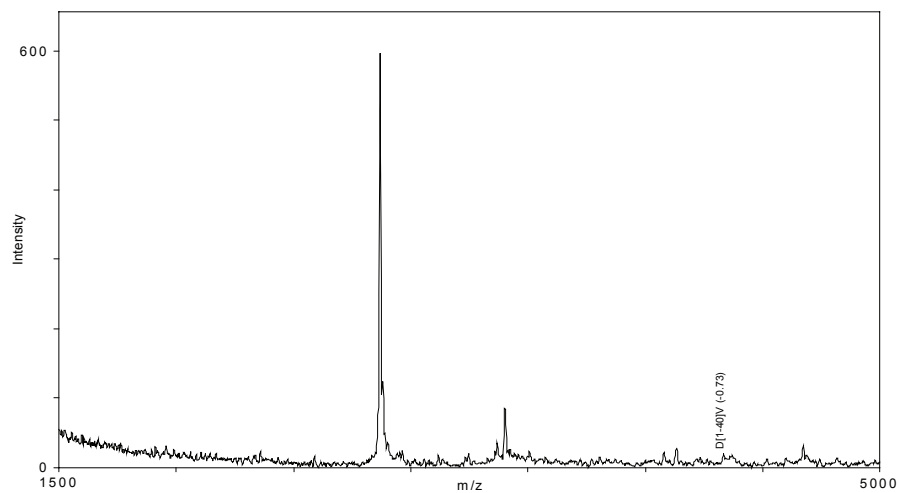

**Sulindac sulfide**  
**100  $\mu$ M**

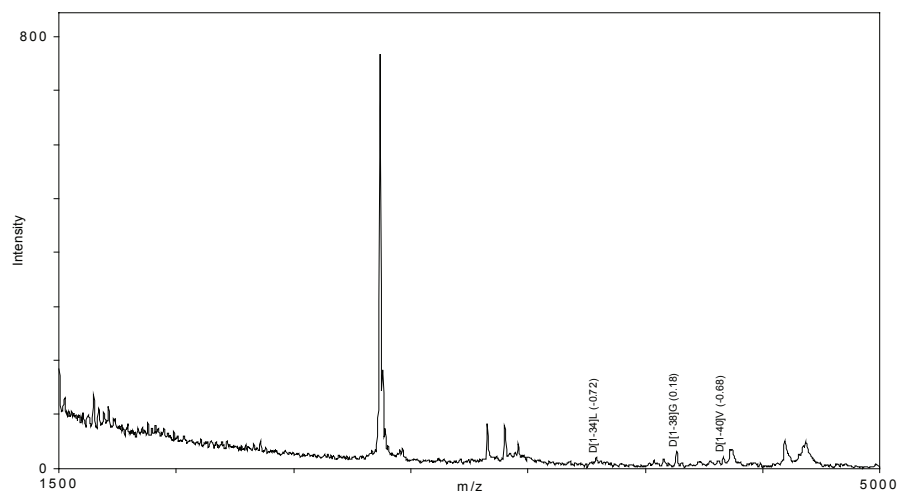

Supplement: cn3000857_si_001.pdf [file cn3000857_si_001.pdf]
